# Supplementary material for: Synthesis and fluorescence properties of 9,9-dimethylfluorene-diyl bridged molecular gyrotops: effects of slight fluorophore motion on fluorescence efficiency in the solid state
Source: Royal Society of Chemistry journal article supplement (doi:10.1039/d2nj05873a), 2023-01-01
Supplement: d2nj05873a1.pdf [file d2nj05873a1.pdf]

## Supplementary Information

### Synthesis and fluorescence properties of 9,9-dimethylfluorene-diyl bridged molecular gyrotops: Effects of slight fluorophore motion on fluorescence efficiency in a solid-state

Reina Yoshizawa,<sup>a</sup> Yusuke Inagaki,<sup>a</sup> Hiroyuki Momma,<sup>b</sup> Eunsang Kwon,<sup>b</sup> Kazuaki Ohara,<sup>c</sup> Kentaro Yamaguchi,<sup>c</sup> and Wataru Setaka\*<sup>a</sup>

*a. Division of Applied Chemistry, Faculty of Urban Environmental Sciences, Tokyo Metropolitan University, Hachioji, Tokyo 192-0397, Japan*

*b. Faculty of Pharmaceutic Research and Analytical Center for Giant Molecules, Graduate School of Science, Tohoku University, Aoba-ku, Sendai, 980-8578, Japan.*

*c. Faculty of Pharmaceutical Sciences at Kagawa Campus, Tokushima Bunri University, 1314-1 Shido, Sanuki, Kagawa 769-2193, Japan.*

E-mail: wsetaka@tmu.ac.jp

(Total 26 pages including this cover page)

#### 1. Copies of NMR and HRMS Spectra for New Compounds

- Fig. S1.** <sup>1</sup>H NMR spectrum of **C10FluC10** in CDCl<sub>3</sub>.  
**Fig. S2.** <sup>13</sup>C NMR spectrum of **C10FluC10** in CDCl<sub>3</sub>.  
**Fig. S3.** HRMS spectrum of **C10FluC10** (ESI, positive). Top: obsd. Bottom: sim.  
**Fig. S4.** <sup>1</sup>H NMR spectrum of **C12FluC12** in CDCl<sub>3</sub>.  
**Fig. S5.** <sup>13</sup>C NMR spectrum of **C12FluC12** in CDCl<sub>3</sub>.  
**Fig. S6.** HRMS spectrum of **C12FluC12** (ESI, positive). Top: obsd. Bottom: sim.  
**Fig. S7.** <sup>1</sup>H NMR spectrum of **C18** in CDCl<sub>3</sub>.  
**Fig. S8.** <sup>13</sup>C NMR spectrum of **C18** in CDCl<sub>3</sub>.  
**Fig. S9.** HRMS spectrum of **C18** (ESI, positive). Top: obsd. Bottom: sim.  
**Fig. S10.** <sup>1</sup>H NMR spectrum of **C18i** in CDCl<sub>3</sub>.  
**Fig. S11.** <sup>13</sup>C NMR spectrum of **C18i** in CDCl<sub>3</sub>.  
**Fig. S12.** HRMS spectrum of **C18i** (ESI, positive). Top: obsd. Bottom: sim.  
**Fig. S13.** <sup>1</sup>H NMR spectrum of **C22** in CDCl<sub>3</sub>.  
**Fig. S14.** <sup>13</sup>C NMR spectrum of **C22** in CDCl<sub>3</sub>.  
**Fig. S15.** HRMS spectrum of **C22** (ESI, positive). Top: obsd. Bottom: sim.  
**Fig. S16.** <sup>1</sup>H NMR spectrum of **C22i** in CDCl<sub>3</sub>.  
**Fig. S17.** <sup>13</sup>C NMR spectrum of **C22i** in CDCl<sub>3</sub>.  
**Fig. S18.** HRMS spectrum of **C22i** (ESI, positive). Top: obsd. Bottom: sim.  
**Fig. S19.** <sup>1</sup>H NMR spectrum of **Flu-d<sub>4</sub>** in CDCl<sub>3</sub>.  
**Fig. S20.** <sup>13</sup>C NMR spectrum of **Flu-d<sub>4</sub>** in CDCl<sub>3</sub>.  
**Fig. S21.** HRMS spectrum of **Flu-d<sub>4</sub>** (ESI, positive). Top: obsd. Bottom: sim.  
**Fig. S22.** <sup>1</sup>H NMR spectrum of **BrFluBr-d<sub>3</sub>** in CDCl<sub>3</sub>.  
**Fig. S23.** <sup>13</sup>C NMR spectrum of **BrFluBr-d<sub>3</sub>** in CDCl<sub>3</sub>.  
**Fig. S24.** HRMS spectrum of **BrFluBr-d<sub>3</sub>** (ESI, positive). Top: obsd. Bottom: sim.  
**Fig. S25.** <sup>1</sup>H NMR spectrum of **C10FluC10-d<sub>3</sub>** in CDCl<sub>3</sub>.  
**Fig. S26.** <sup>13</sup>C NMR spectrum of **C10FluC10-d<sub>3</sub>** in CDCl<sub>3</sub>.  
**Fig. S27.** HRMS spectrum of **C10FluC10-d<sub>3</sub>** (ESI, positive). Top: obsd. Bottom: sim.  
**Fig. S28.** <sup>1</sup>H NMR spectrum of **C18-d<sub>3</sub>** in CDCl<sub>3</sub>.  
**Fig. S29.** <sup>13</sup>C NMR spectrum of **C18-d<sub>3</sub>** in CDCl<sub>3</sub>.  
**Fig. S30.** HRMS spectrum of **C18-d<sub>3</sub>** (ESI, positive). Top: obsd. Bottom: sim.  
**Fig. S31.** <sup>1</sup>H NMR spectrum of **C12FluC12-d<sub>3</sub>** in CDCl<sub>3</sub>.  
**Fig. S32.** <sup>13</sup>C NMR spectrum of **C12FluC12-d<sub>3</sub>** in CDCl<sub>3</sub>.  
**Fig. S33.** HRMS spectrum of **C12FluC12-d<sub>3</sub>** (ESI, positive). Top: obsd. Bottom: sim.  
**Fig. S34.** <sup>1</sup>H NMR spectrum of **C22-d<sub>3</sub>** in CDCl<sub>3</sub>.  
**Fig. S35.** <sup>13</sup>C NMR spectrum of **C22-d<sub>3</sub>** in CDCl<sub>3</sub>.  
**Fig. S36.** HRMS spectrum of **C22-d<sub>3</sub>** (ESI, positive). Top: obsd. Bottom: sim.

#### 2. Appended Data of X-ray Crystallography

**Table S1.** Crystal Data

- Fig. S37.** An ORTEP drawing (30% thermal ellipsoids) of molecular structure of **C18** determined by X-ray crystallography.  
**Fig. S38.** An ORTEP drawing (30% thermal ellipsoids) of molecular structure of **C22•2EtOH** determined by X-ray crystallography.  
**Fig. S39.** An ORTEP drawing (30% thermal ellipsoids) of molecular structure of **Flu** determined by X-ray crystallography.  
**Fig. S40.** An ORTEP drawing (30% thermal ellipsoids) of molecular structure of **TMS** determined by X-ray crystallography.

#### 3. Appended Data of Fluorescence Measurements

- Fig. S41.** Fluorescence life-time measurements for fluorenes in hexane: (a) **C18**, (b) **C22**, (c) **TMS**, and (d) **Flu**.  
**Fig. S42.** Fluorescence life-time measurements for fluorenes in solid-states: (a) **C18**, (b) **C22**, (c) **TMS**, and (d) **Flu**.

#### 4. Appended Data of Solid-state <sup>2</sup>H NMR Study

- Figure S43.** Inversion-recovery <sup>2</sup>H NMR spectroscopy data (300 K) and single exponential fit of (a) **C18-d<sub>3</sub>** and (b) **C22-d<sub>3</sub>**.

# 1. Copies of NMR and HRMS Spectra for New Compounds

## a. Spectra of C10FluC10

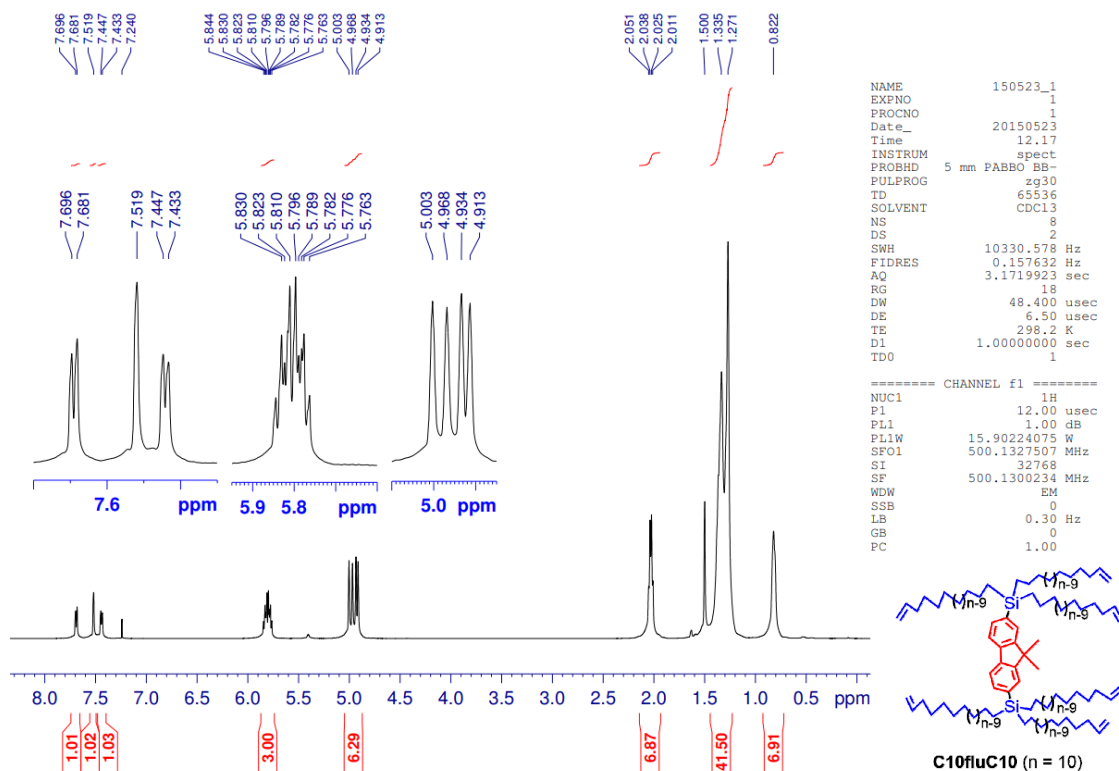

Fig. S1. <sup>1</sup>H NMR spectrum of C10FluC10 in CDCl<sub>3</sub>.

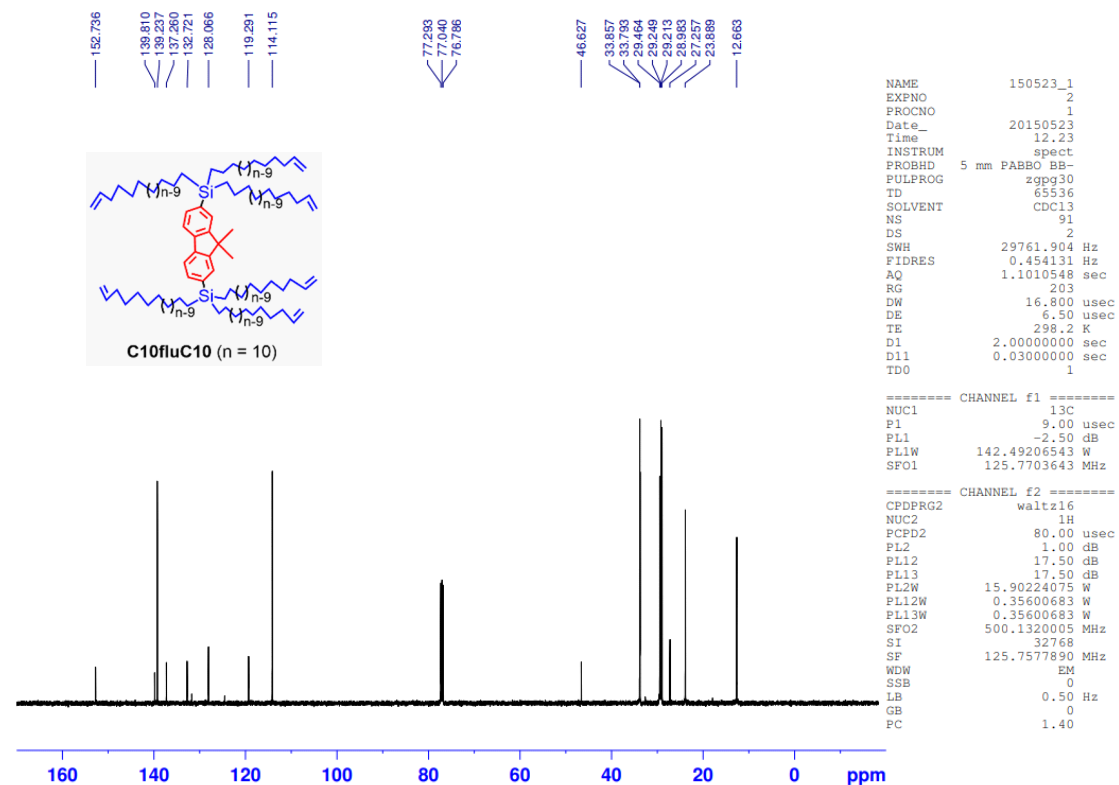

Fig. S2. <sup>13</sup>C NMR spectrum of C10FluC10 in CDCl<sub>3</sub>.

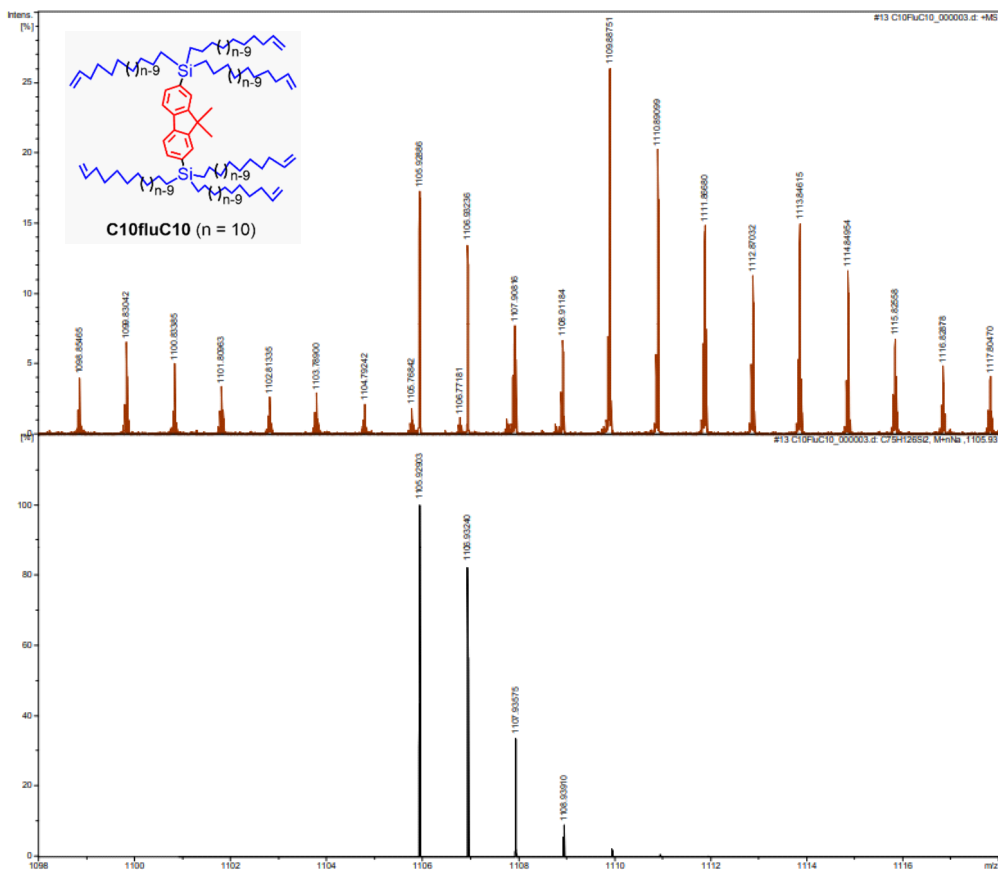

Fig. S3. HRMS spectrum of C10FluC10 (ESI, positive). Top: obsd. Bottom: sim.

### b. Spectra of C12FluC12

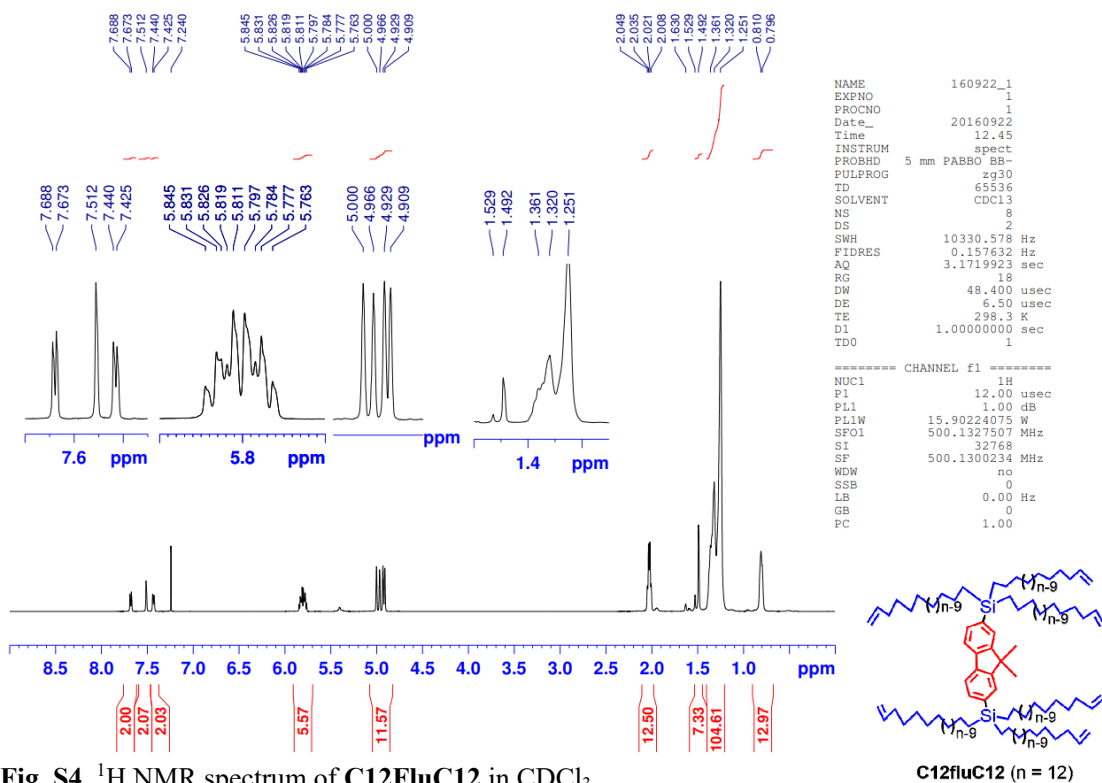

Fig. S4. <sup>1</sup>H NMR spectrum of C12FluC12 in CDCl<sub>3</sub>.

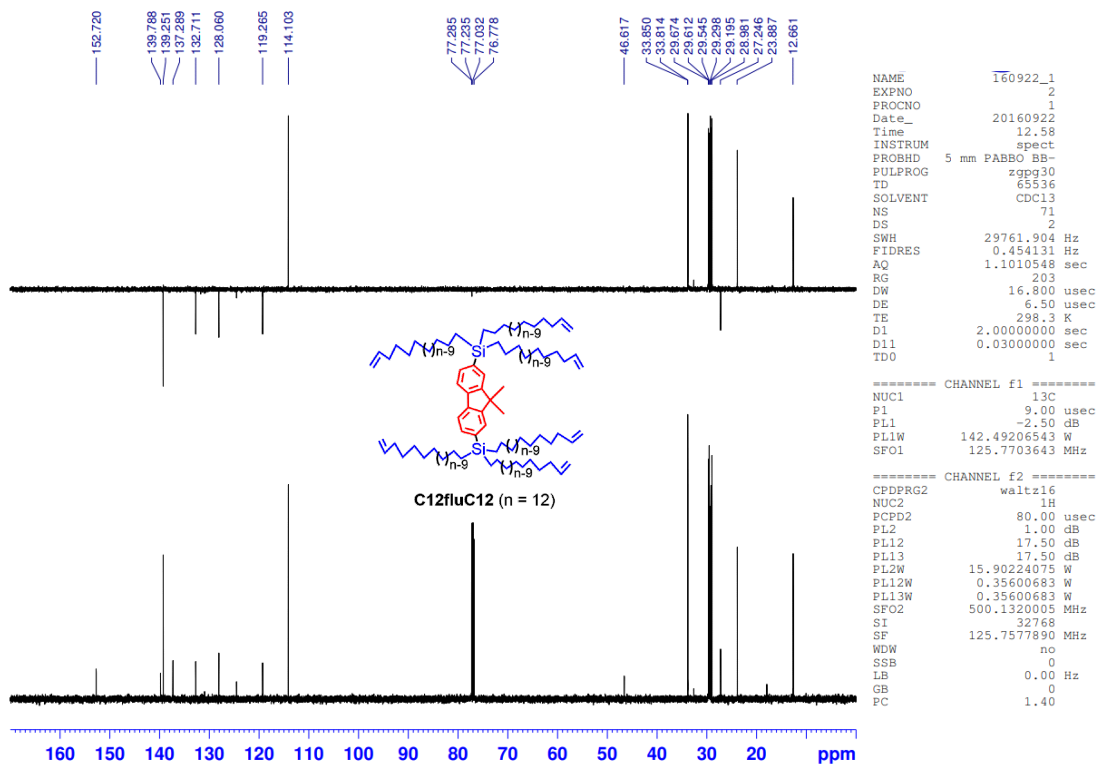

Fig. S5.  $^{13}\text{C}$  NMR spectrum of C12FluC12 in  $\text{CDCl}_3$ .

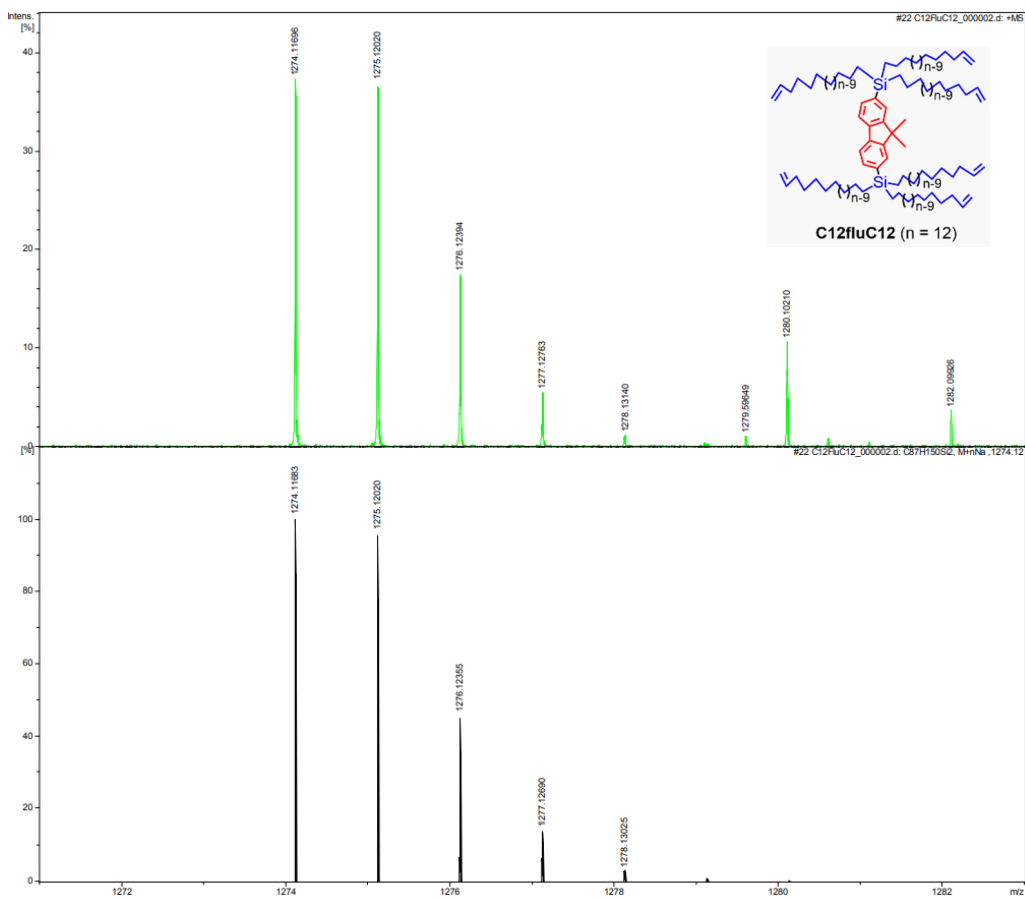

Fig. S6. HRMS spectrum of C12FluC12 (ESI, positive). Top: obsd. Bottom: sim.

### c. Spectra of C18

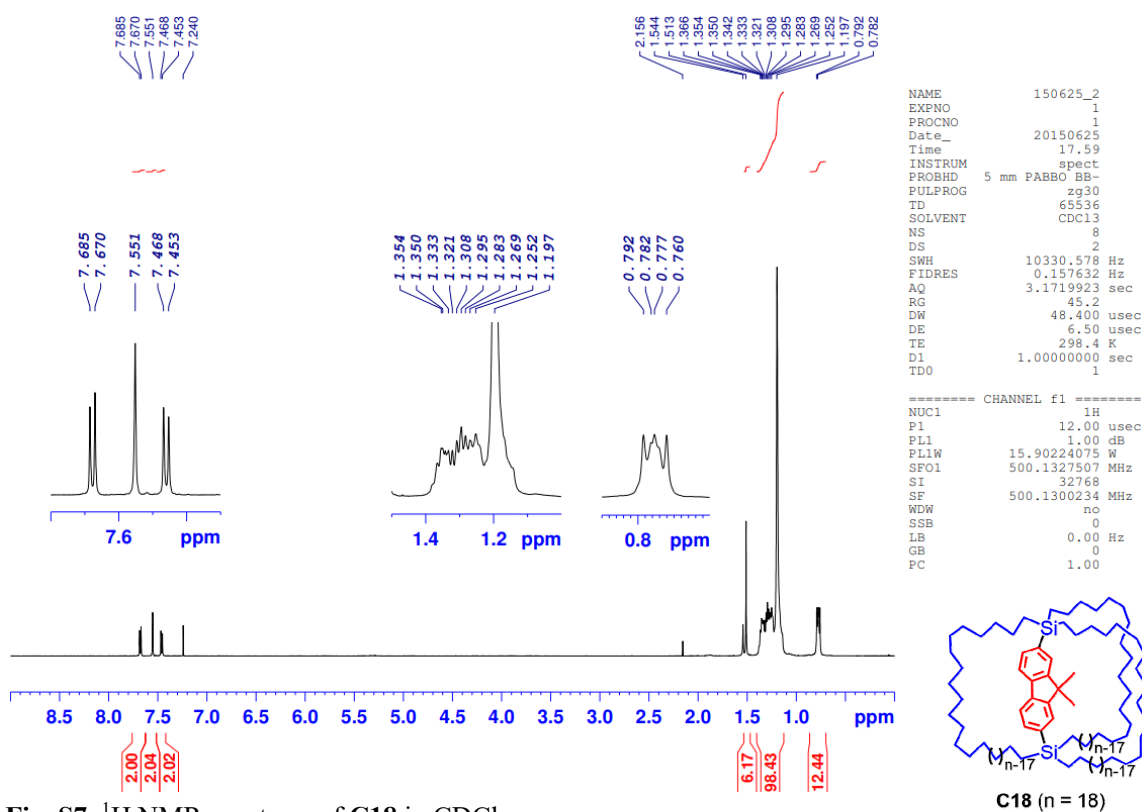

Fig. S7. <sup>1</sup>H NMR spectrum of C18 in CDCl<sub>3</sub>.

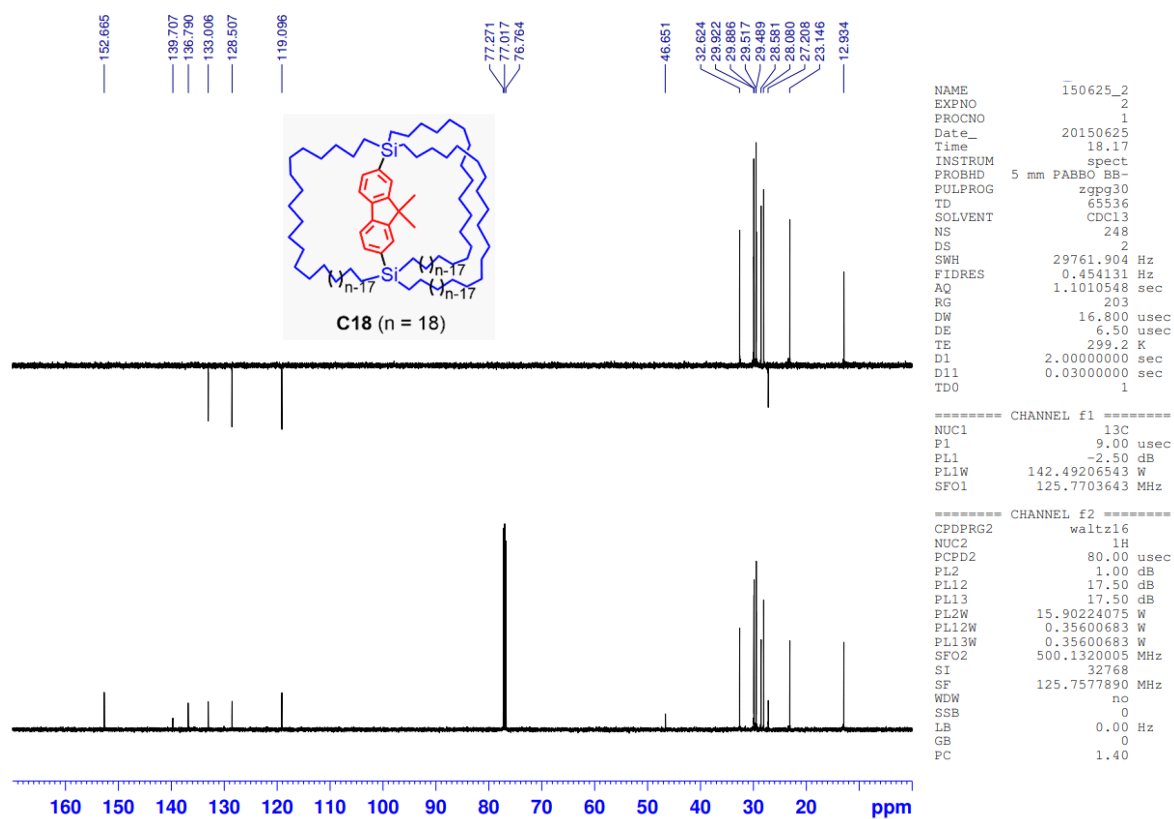

Fig. S8. <sup>13</sup>C NMR spectrum of C18 in CDCl<sub>3</sub>.

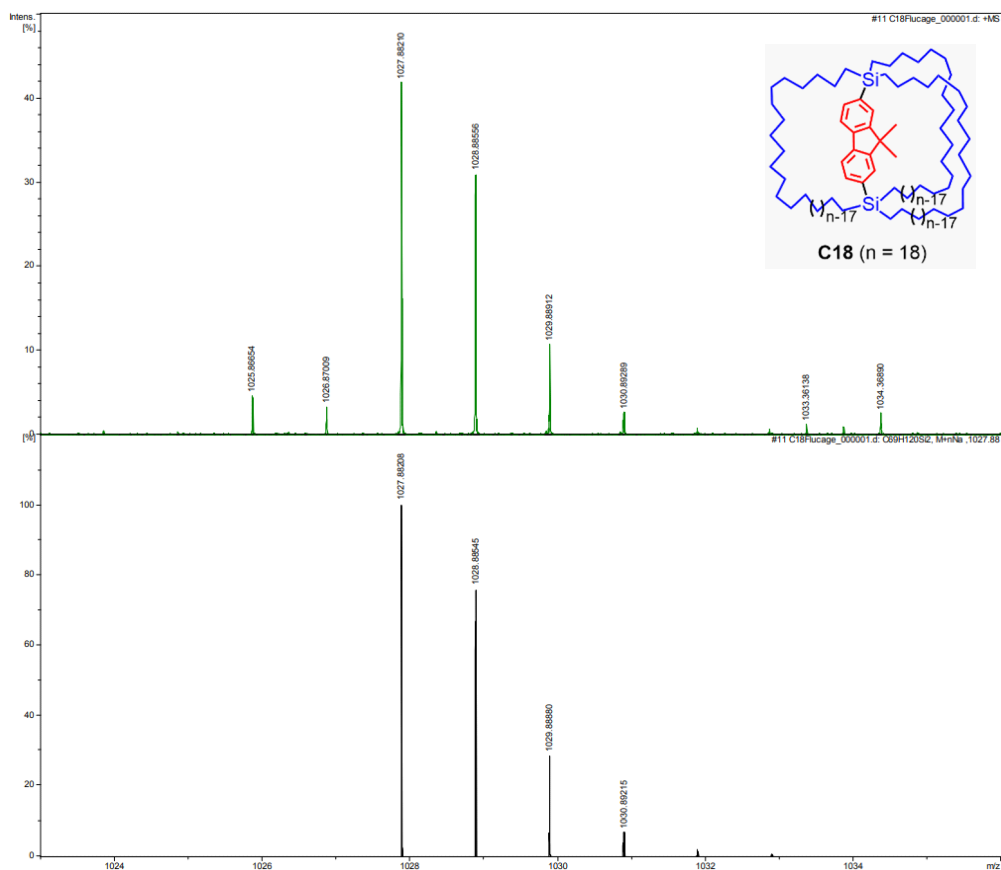

Fig. S9. HRMS spectrum of C18 (ESI, positive). Top: obsd. Bottom: sim.

d. Spectra of C18i

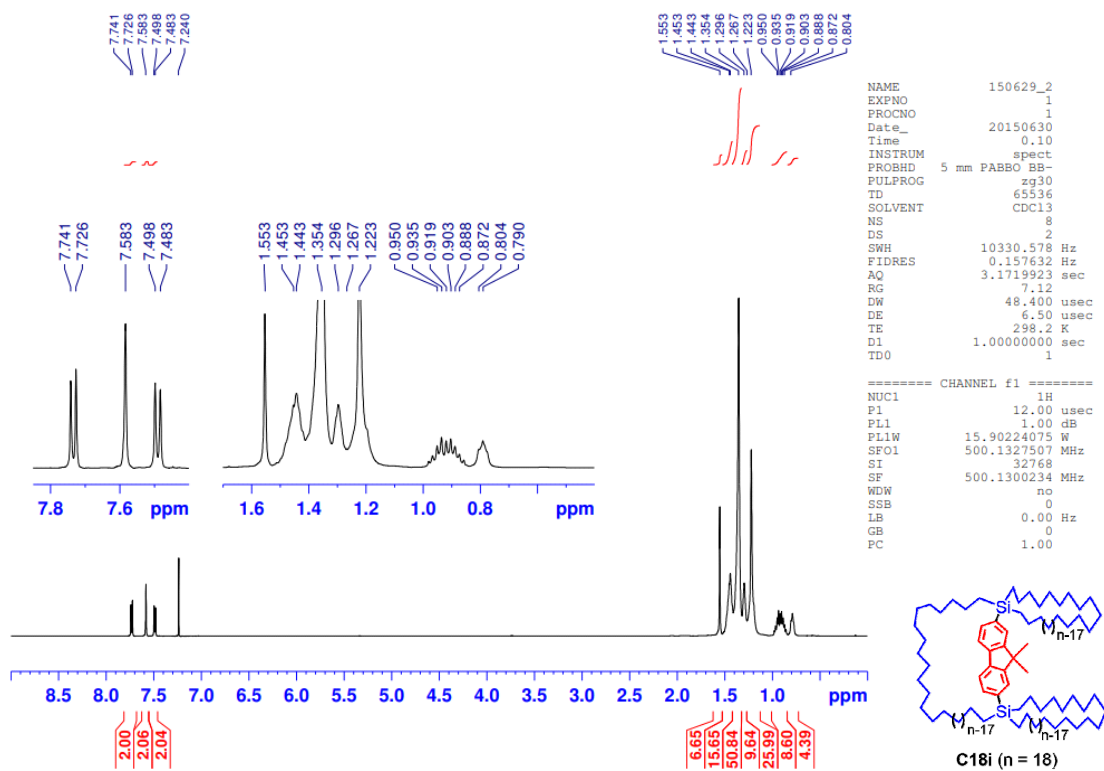

Fig. S10. <sup>1</sup>H NMR spectrum of C18i in CDCl<sub>3</sub>.

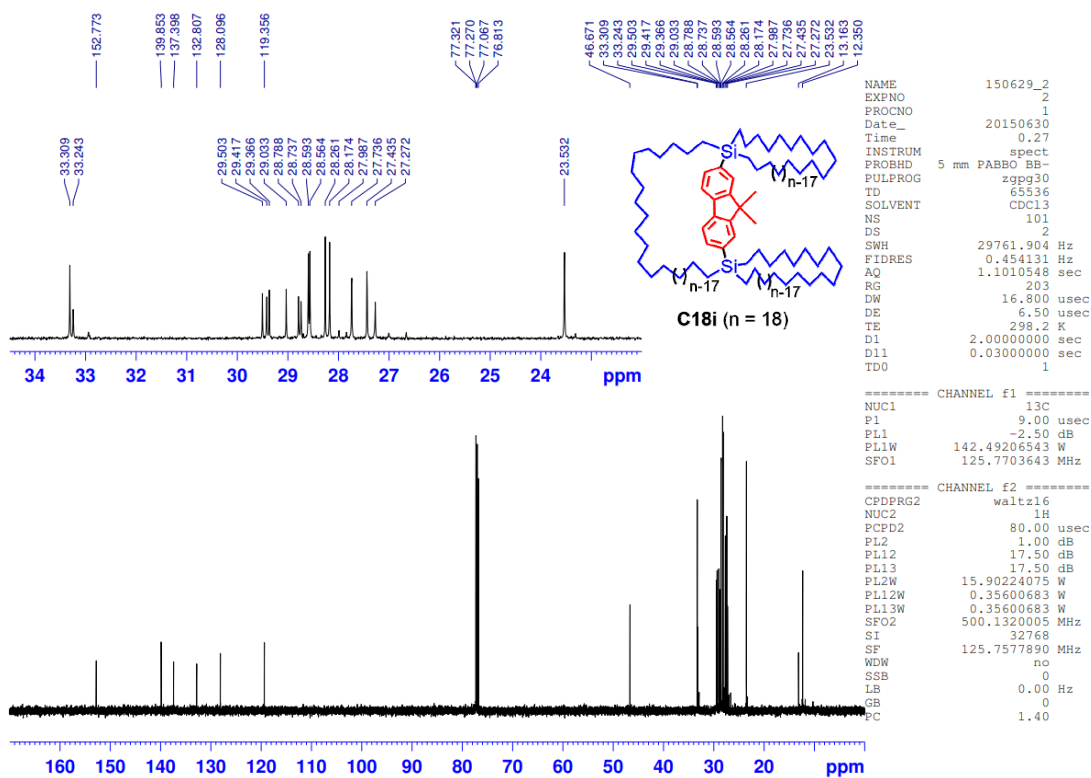

Fig. S11.  $^{13}\text{C}$  NMR spectrum of **C18i** in  $\text{CDCl}_3$ .

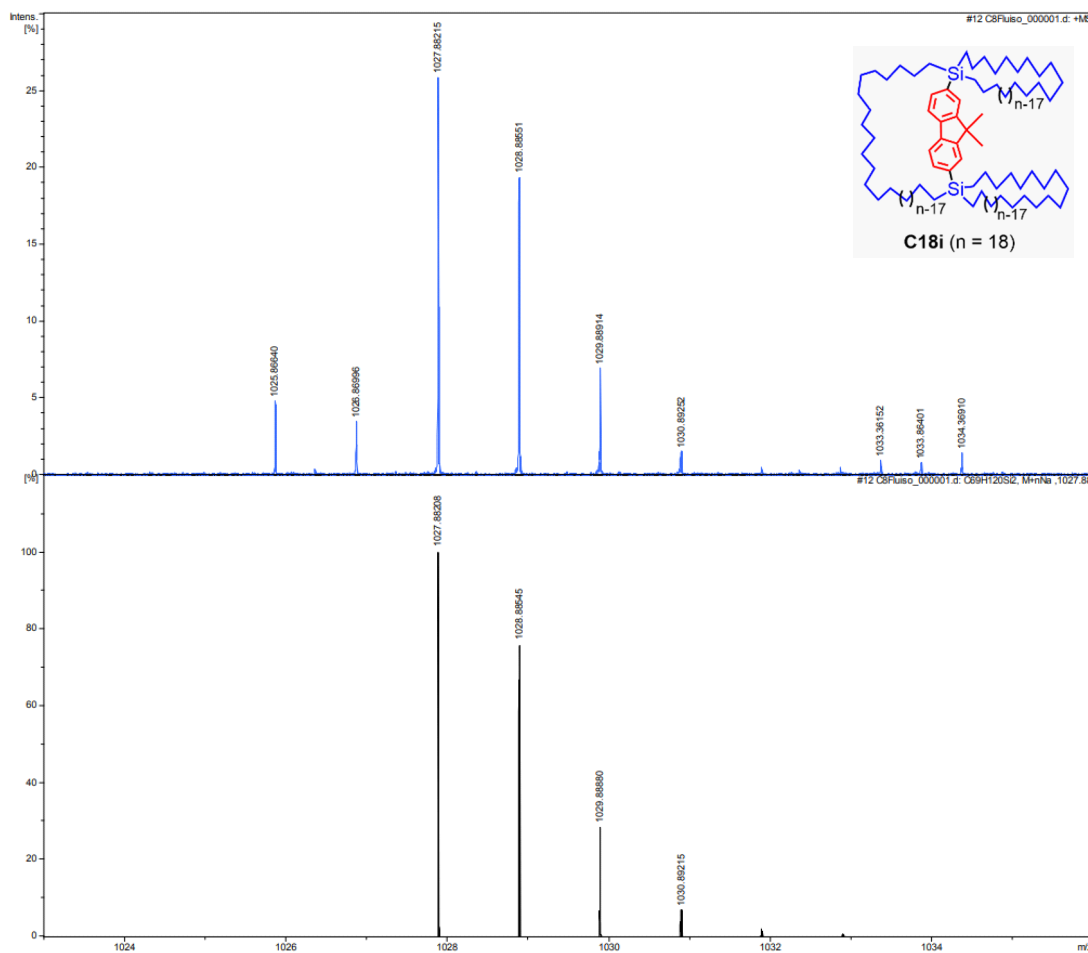

Fig. S12. HRMS spectrum of **C18i** (ESI, positive). Top: obsd. Bottom: sim.

### e. Spectra of C22

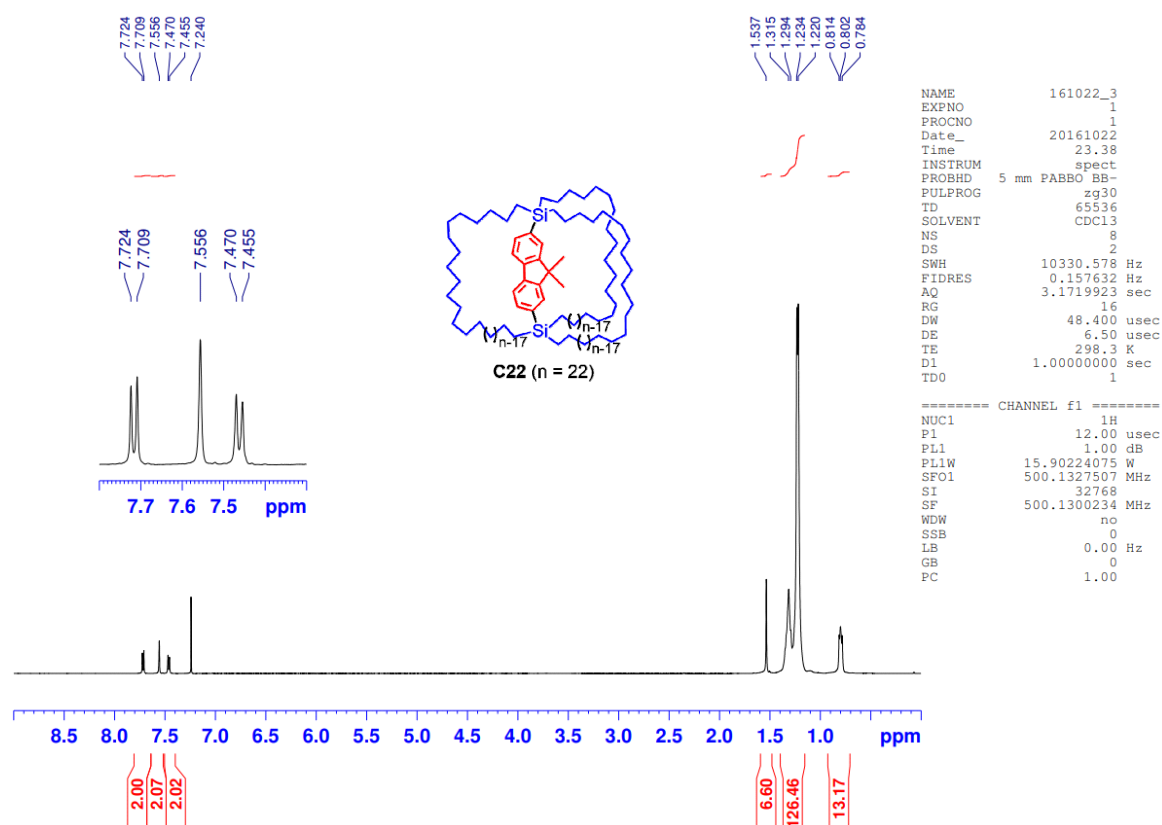

Fig. S13. <sup>1</sup>H NMR spectrum of C22 in CDCl<sub>3</sub>.

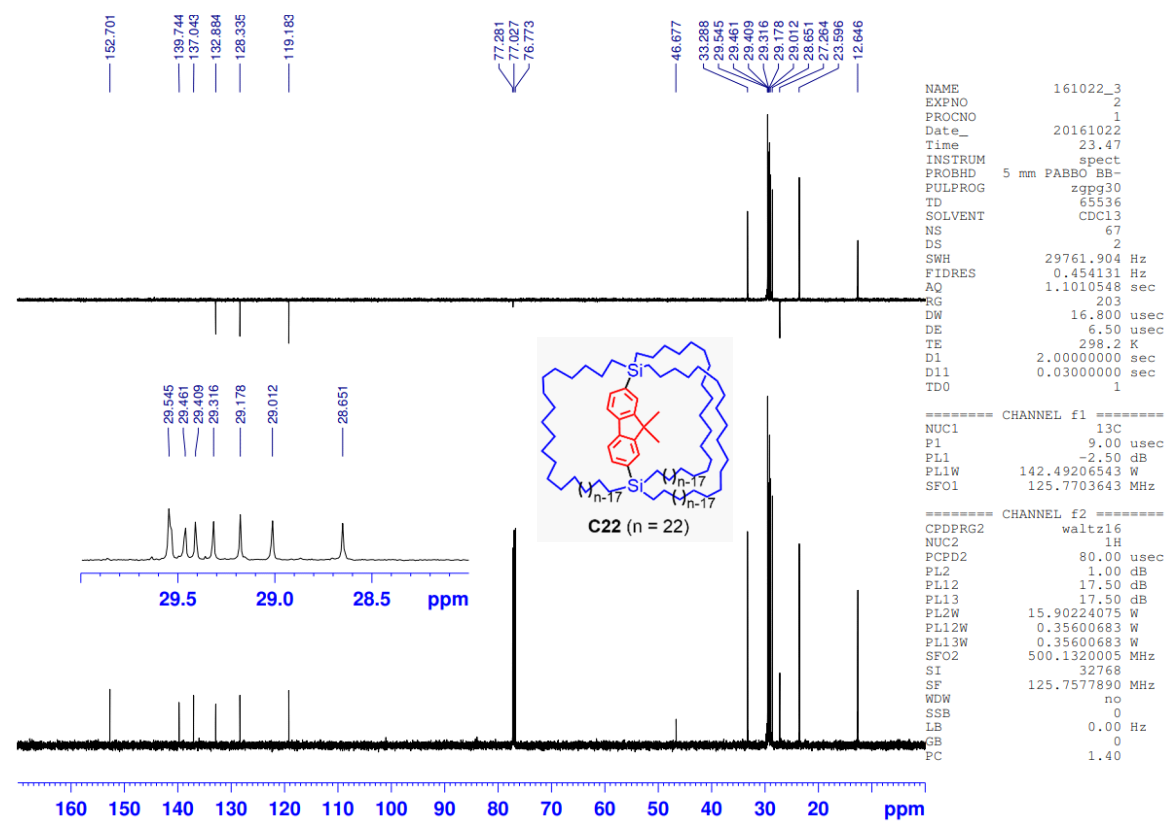

Fig. S14. <sup>13</sup>C NMR spectrum of C22 in CDCl<sub>3</sub>.



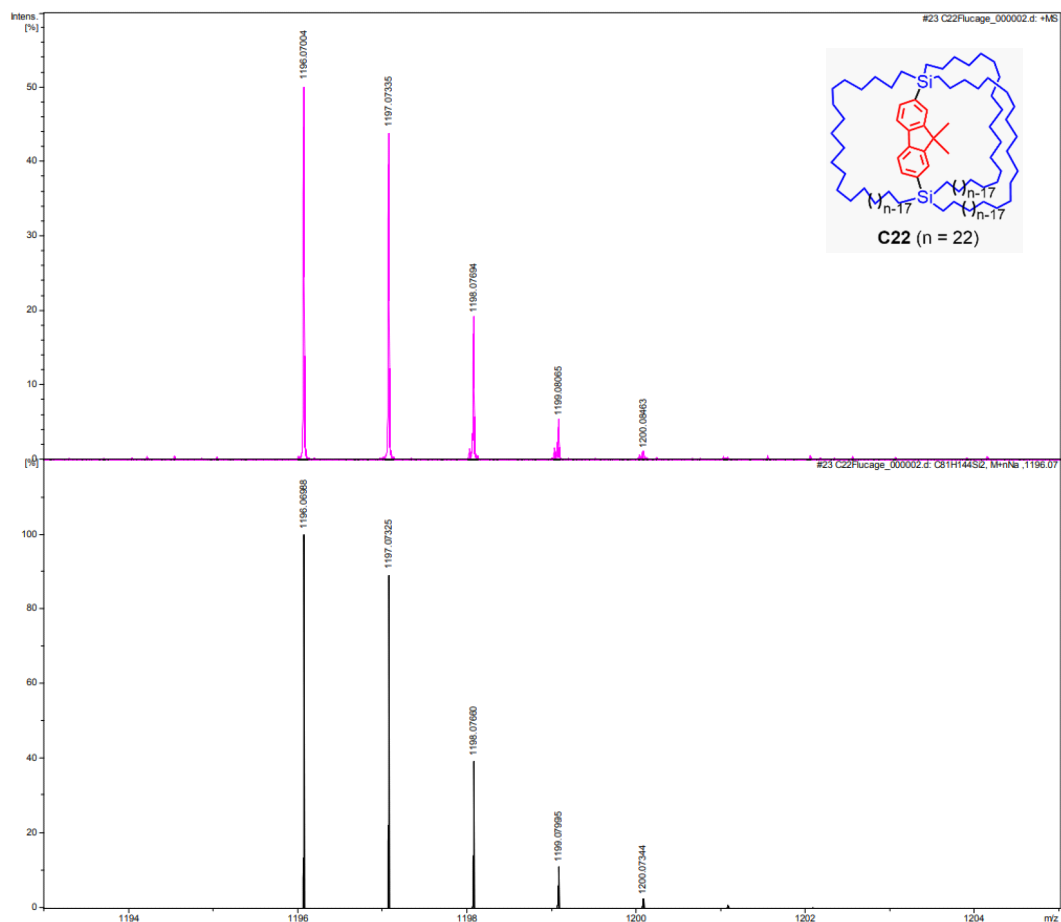

Fig. S15. HRMS spectrum of C22 (ESI, positive). Top: obsd. Bottom: sim.

f. Spectra of C22i

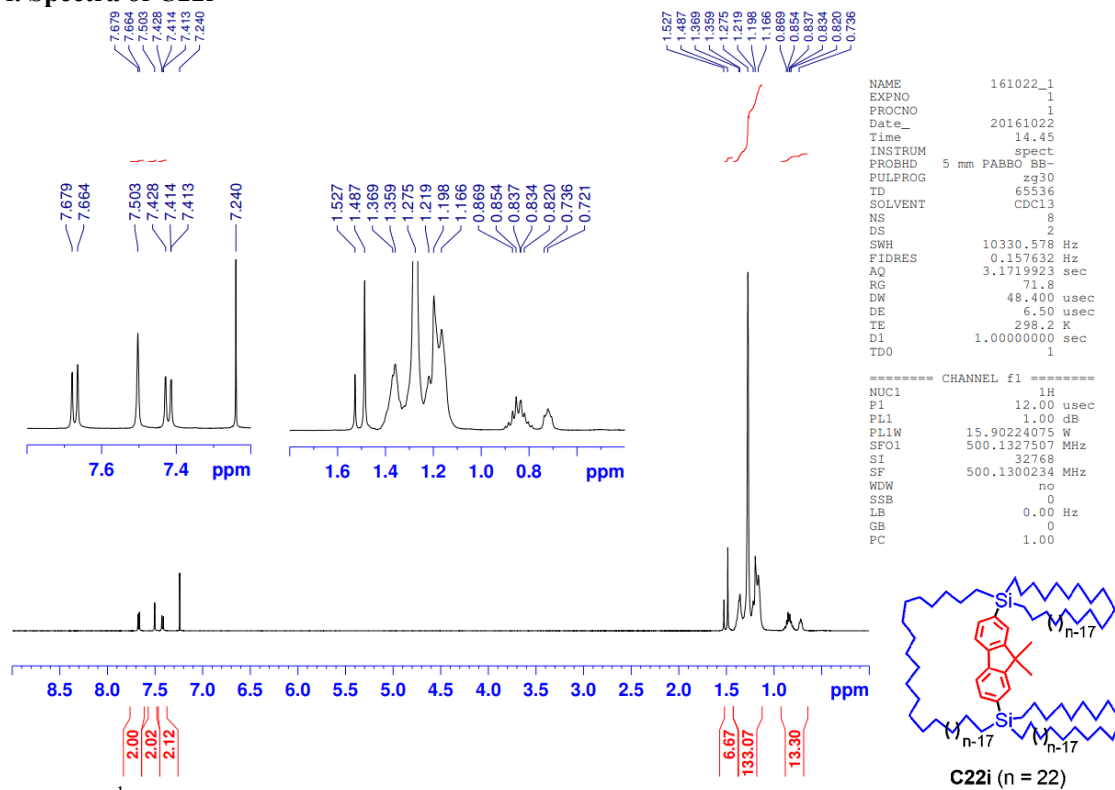

Fig. S16. <sup>1</sup>H NMR spectrum of C22i in CDCl<sub>3</sub>.

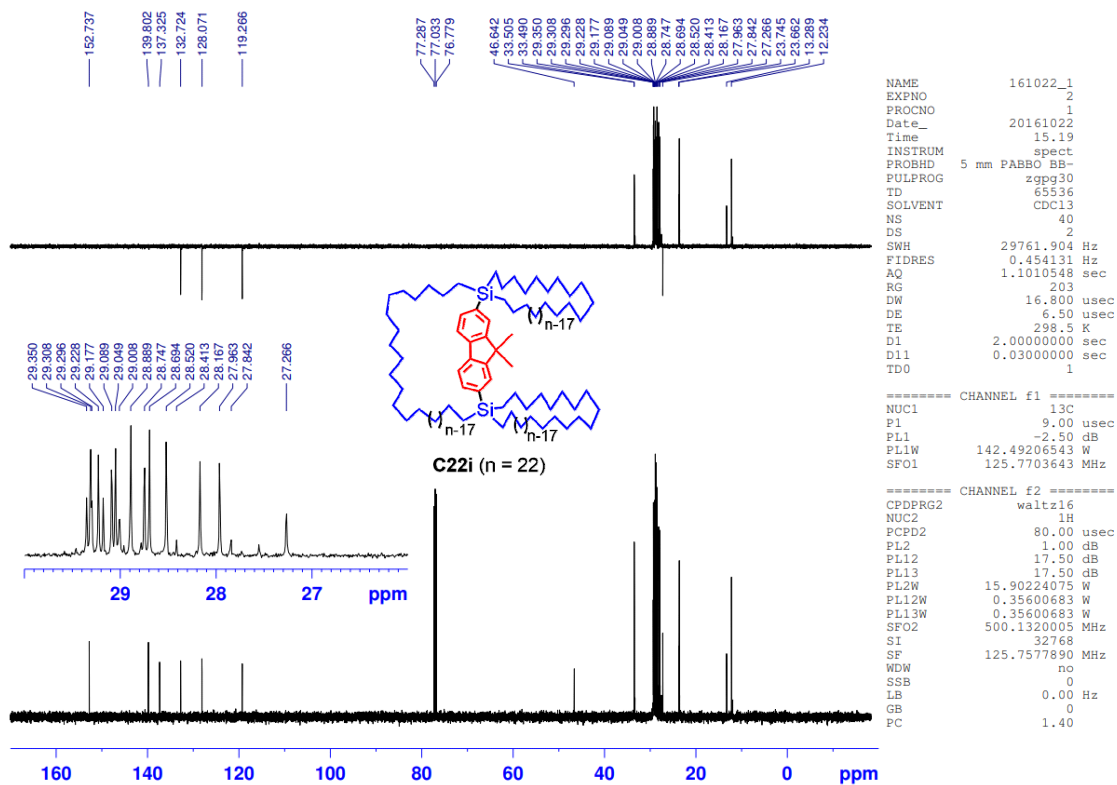

Fig. S17. <sup>13</sup>C NMR spectrum of C22i in CDCl<sub>3</sub>.

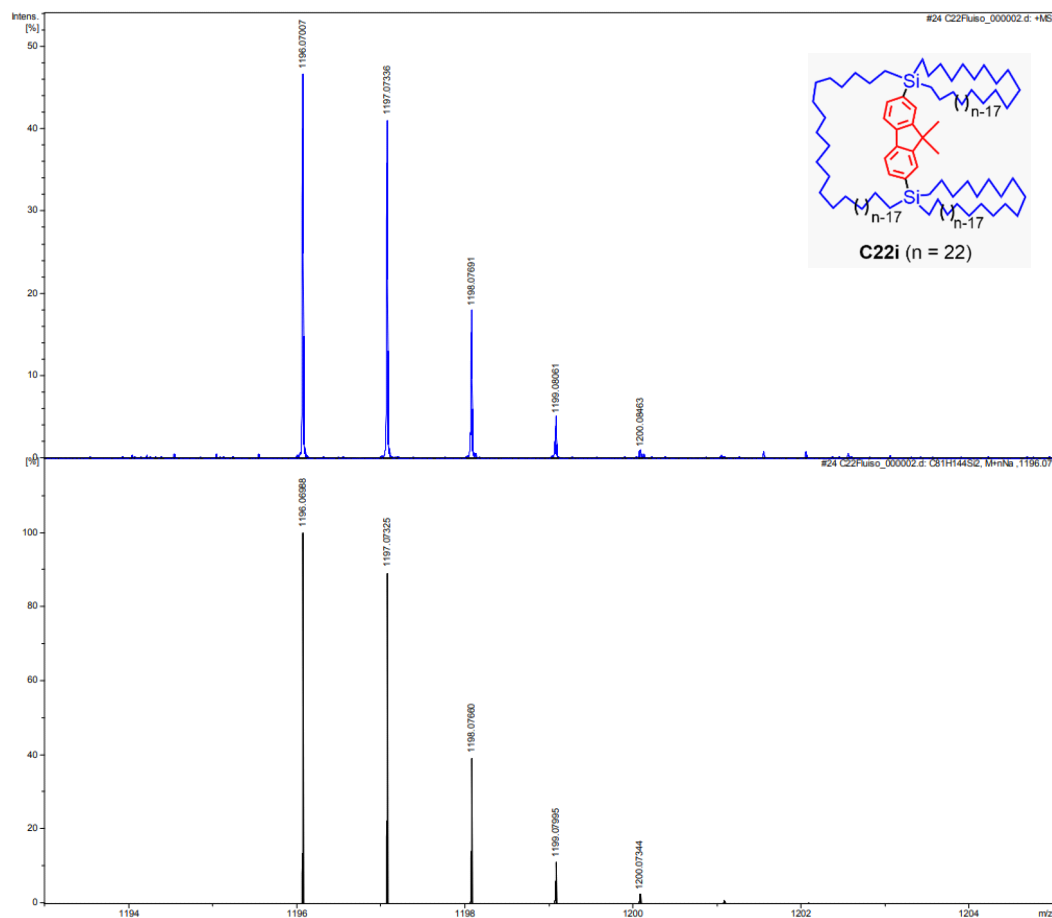

Fig. S18. HRMS spectrum of C22i (ESI, positive). Top: obsd. Bottom: sim.

**g. Spectra of Flu-*d*<sub>4</sub>**

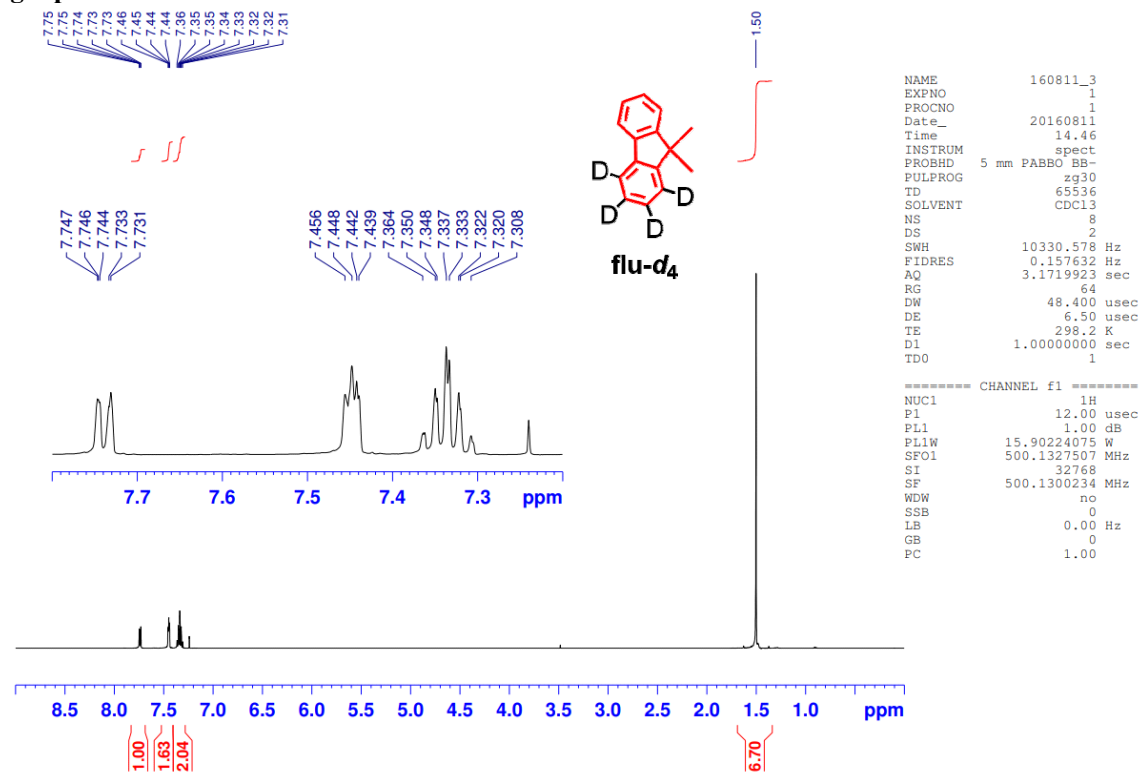

**Fig. S19.** <sup>1</sup>H NMR spectrum of Flu-*d*<sub>4</sub> in CDCl<sub>3</sub>.

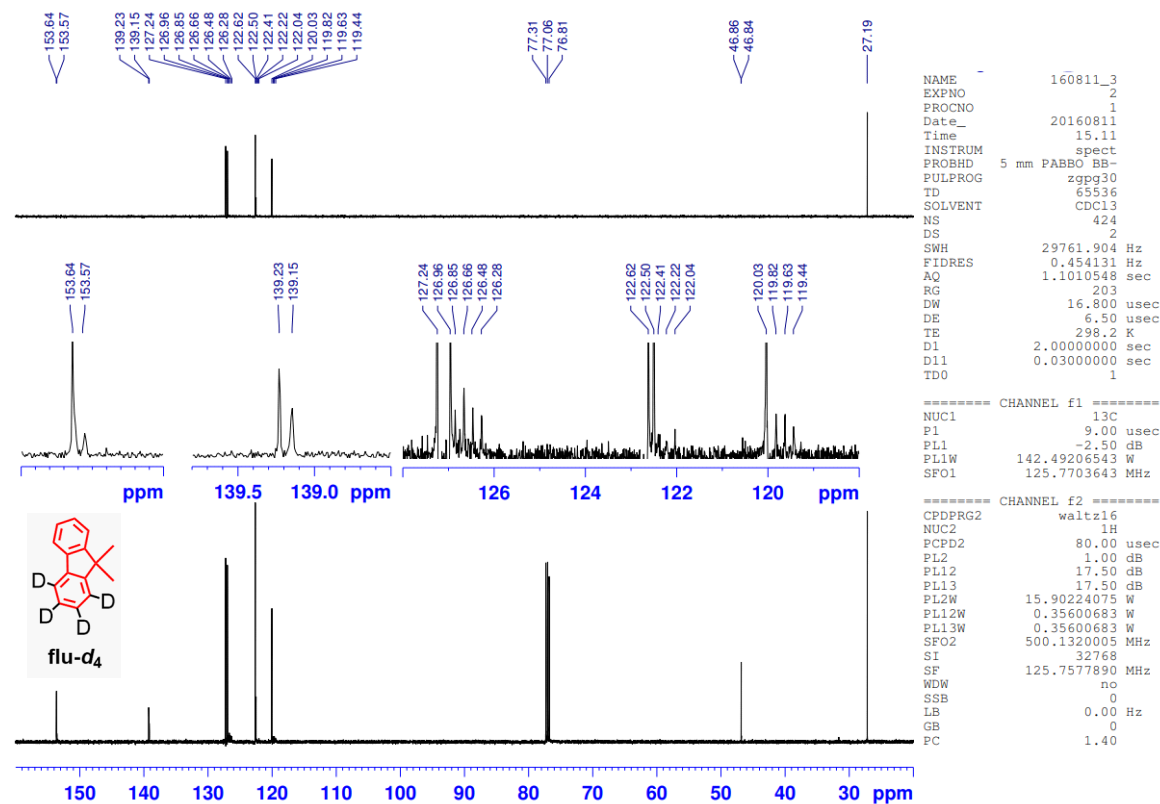

**Fig. S20.** <sup>13</sup>C NMR spectrum of Flu-*d*<sub>4</sub> in CDCl<sub>3</sub>.

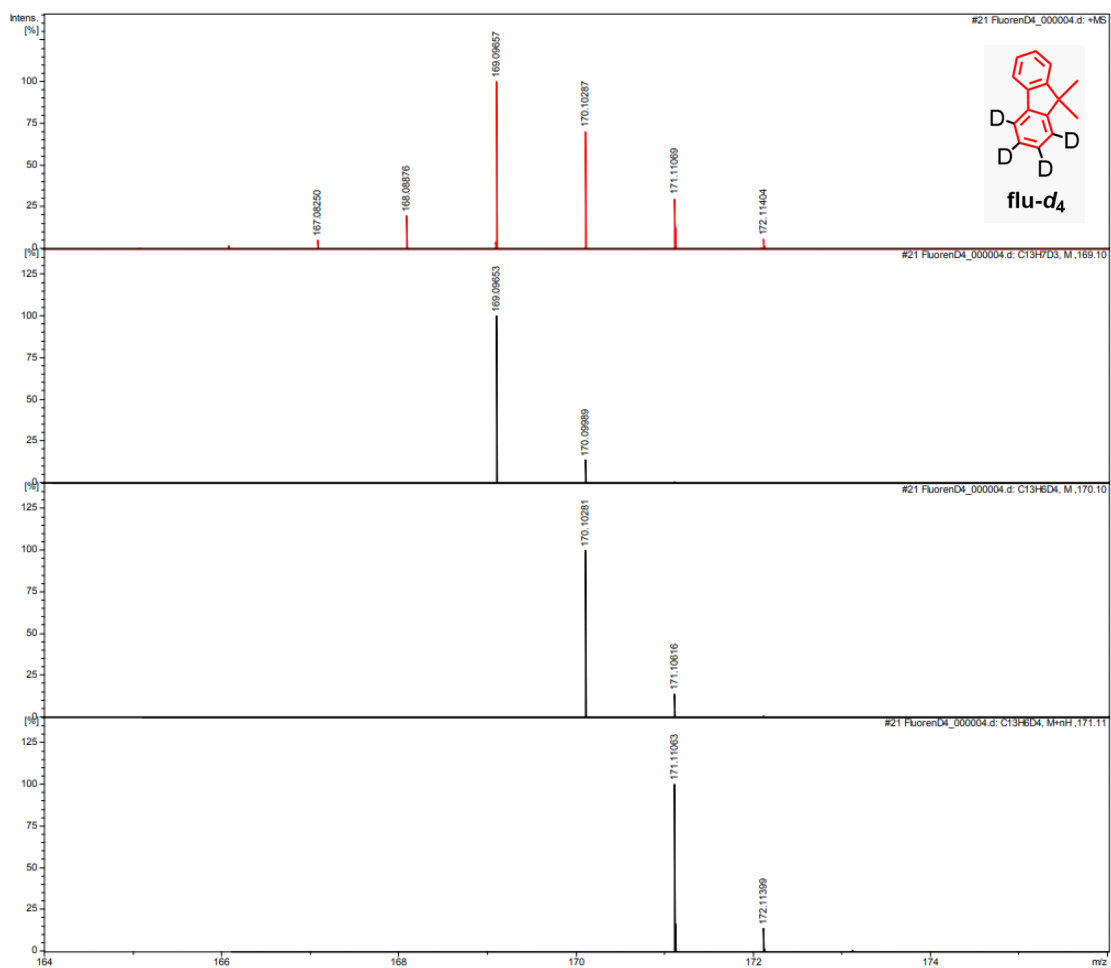

Fig. S21. HRMS spectrum of Flu-d<sub>4</sub> (ESI, positive). Top: obsd. Bottom: sim.

### h. Spectra of BrFluBr-d<sub>3</sub>

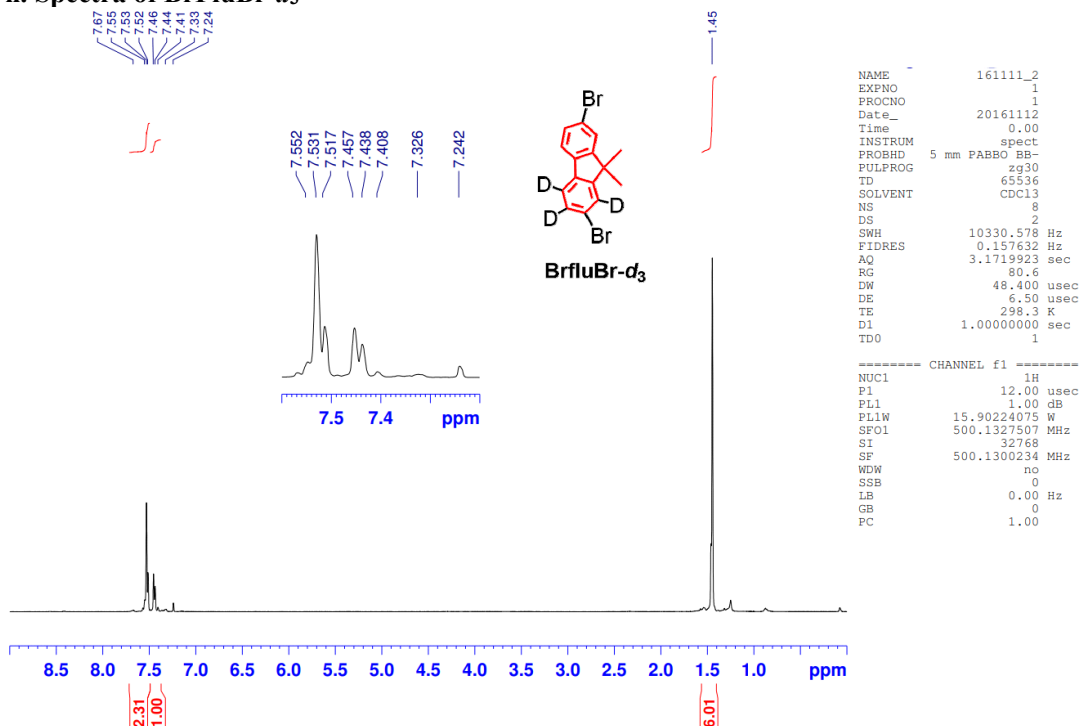

Fig. S22. <sup>1</sup>H NMR spectrum of BrFluBr-d<sub>3</sub> in CDCl<sub>3</sub>.

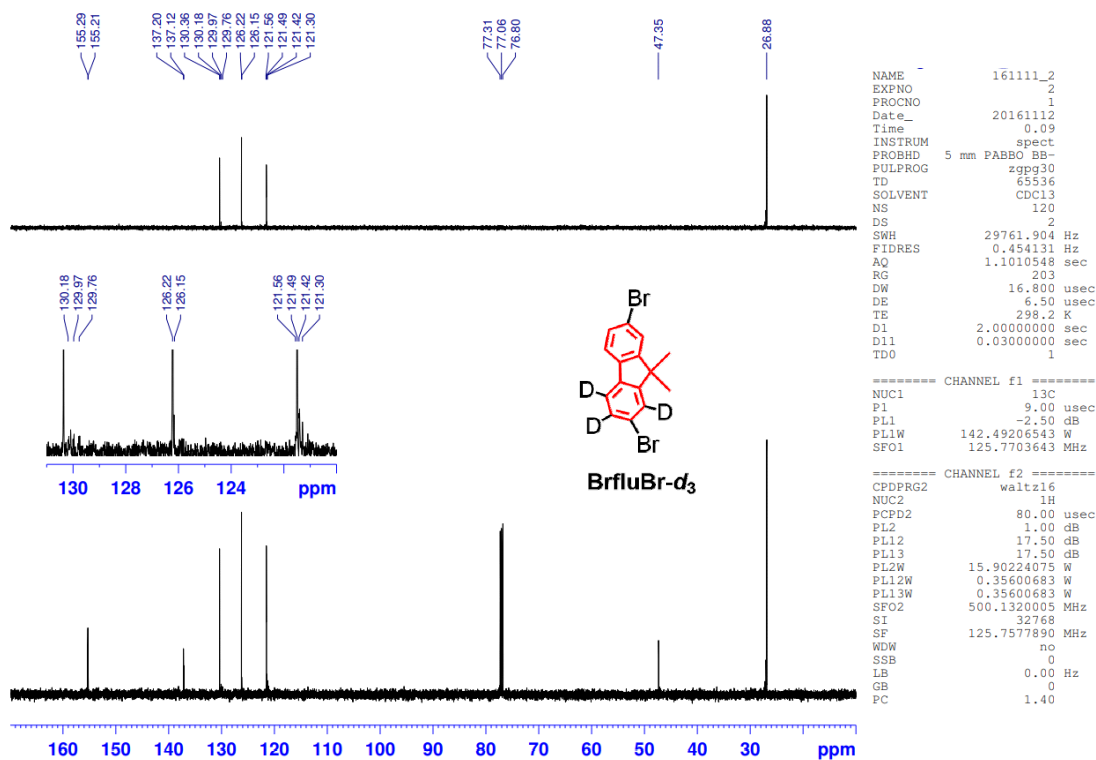

Fig. S23.  $^{13}\text{C}$  NMR spectrum of **BrFluBr- $d_3$**  in  $\text{CDCl}_3$ .

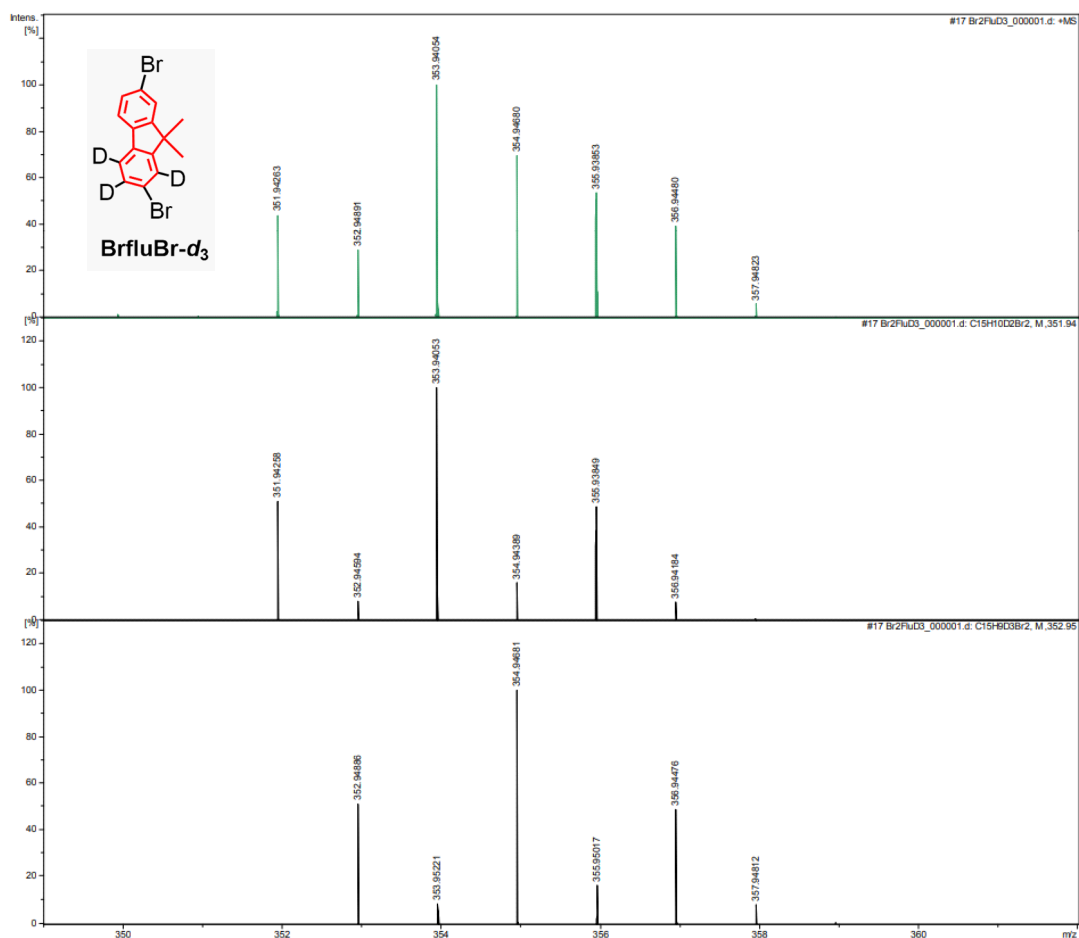

Fig. S24. HRMS spectrum of **BrFluBr- $d_3$**  (ESI, positive). Top: obsd. Bottom: sim.

**i. Spectra of C10FluC10-d<sub>3</sub>**

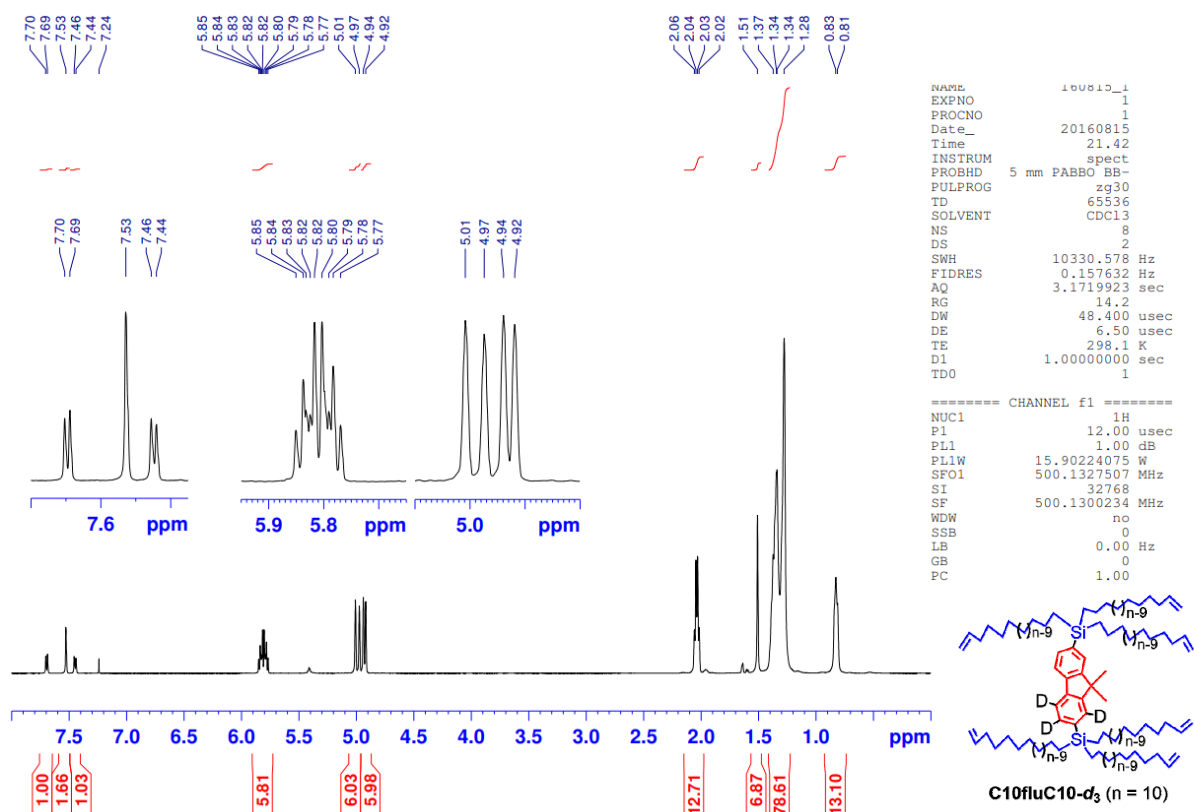

**Fig. S25.** <sup>1</sup>H NMR spectrum of C10FluC10-d<sub>3</sub> in CDCl<sub>3</sub>.

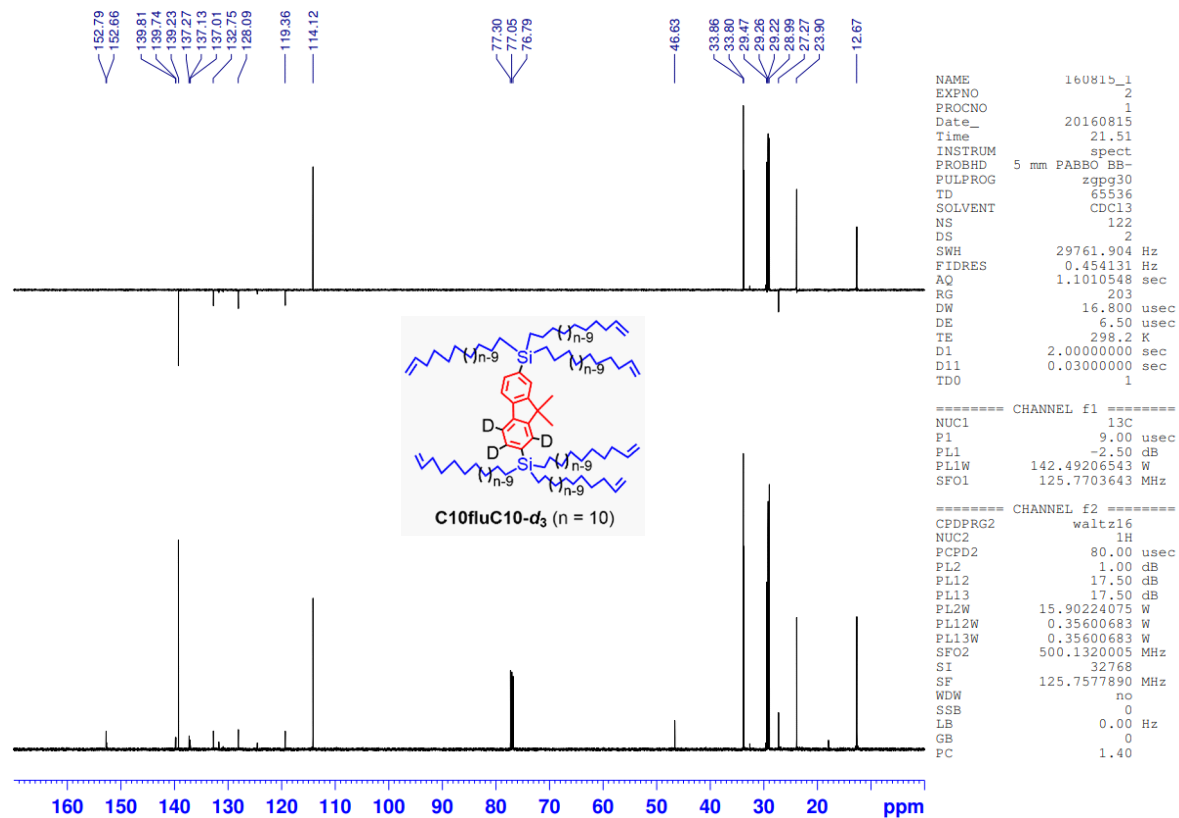

**Fig. S26.** <sup>13</sup>C NMR spectrum of C10FluC10-d<sub>3</sub> in CDCl<sub>3</sub>.

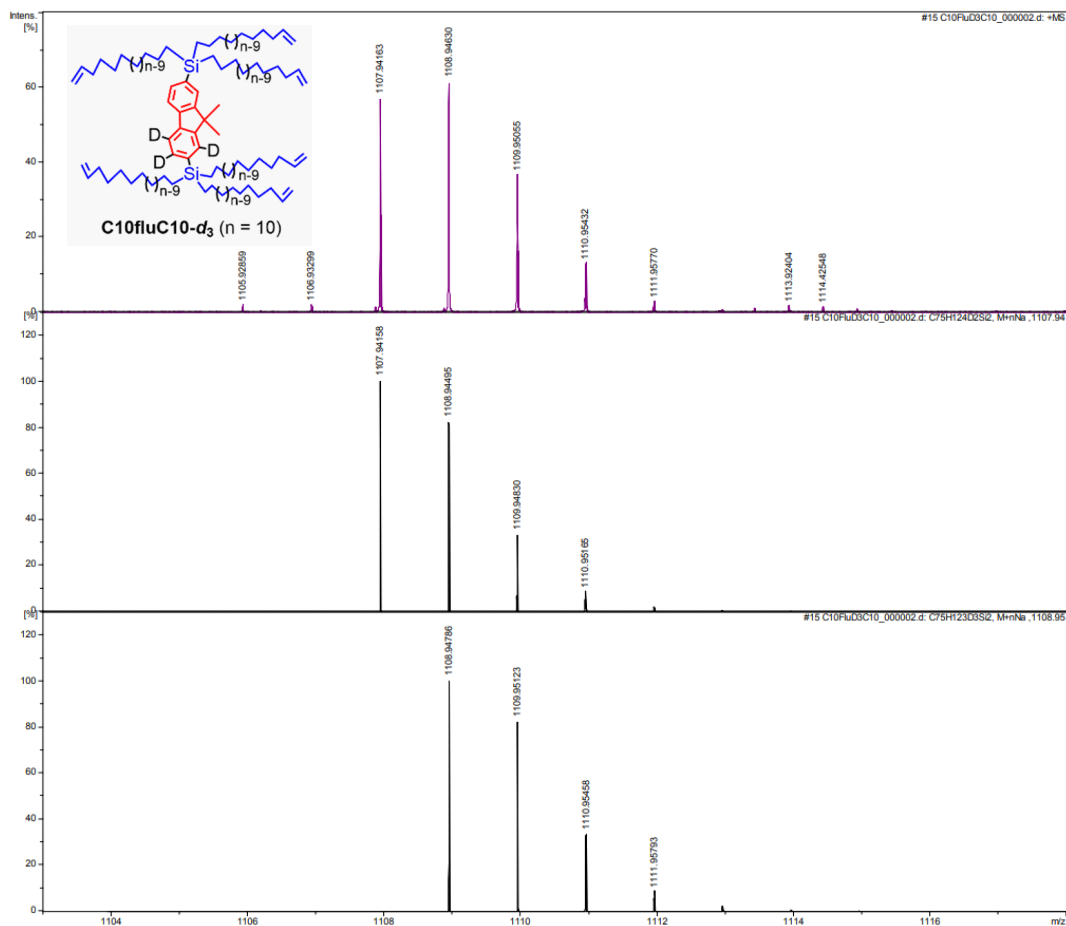

Fig. S27. HRMS spectrum of **C10FluC10-d<sub>3</sub>** (ESI, positive). Top: obsd. Bottom: sim.

### k. Spectra of **C18-d<sub>3</sub>**

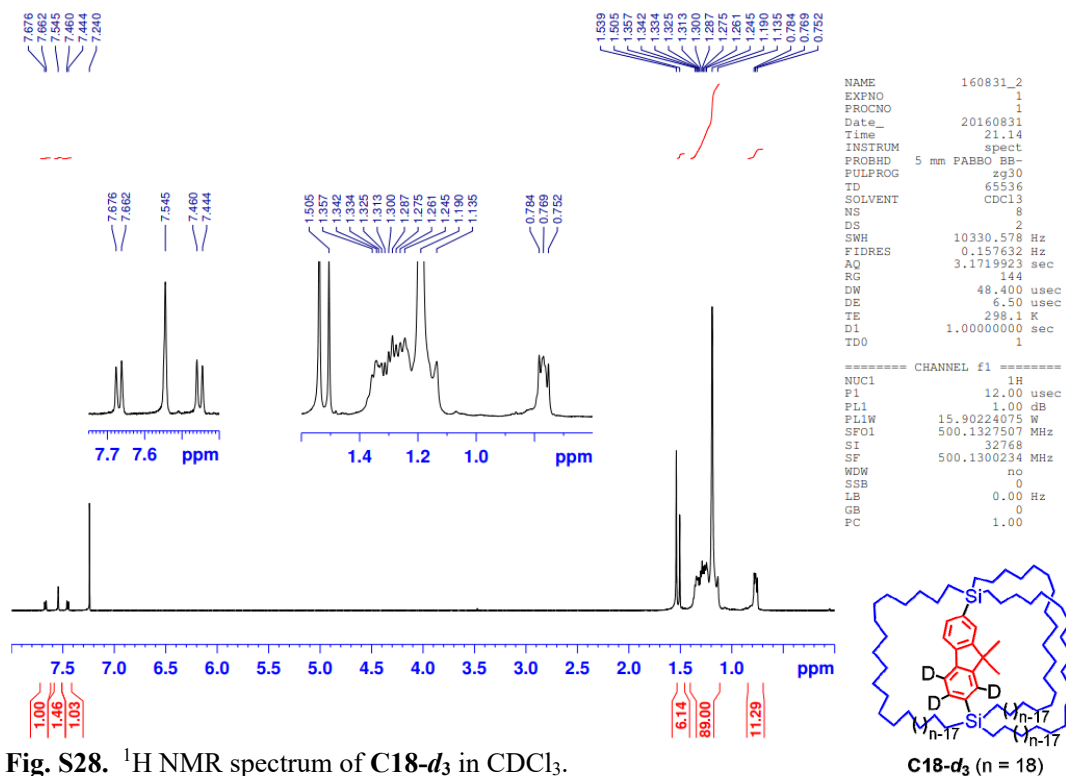

Fig. S28. <sup>1</sup>H NMR spectrum of **C18-d<sub>3</sub>** in CDCl<sub>3</sub>.

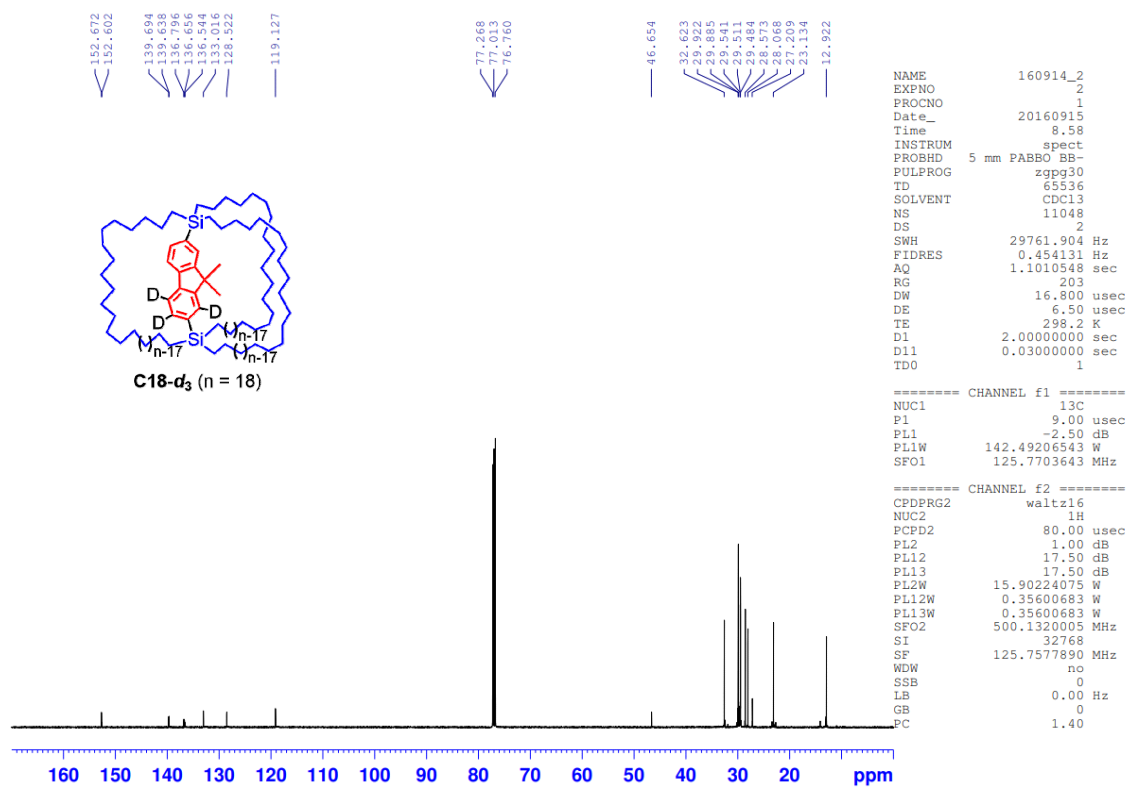

Fig. S29.  $^{13}\text{C}$  NMR spectrum of  $\text{C18-d}_3$  in  $\text{CDCl}_3$ .

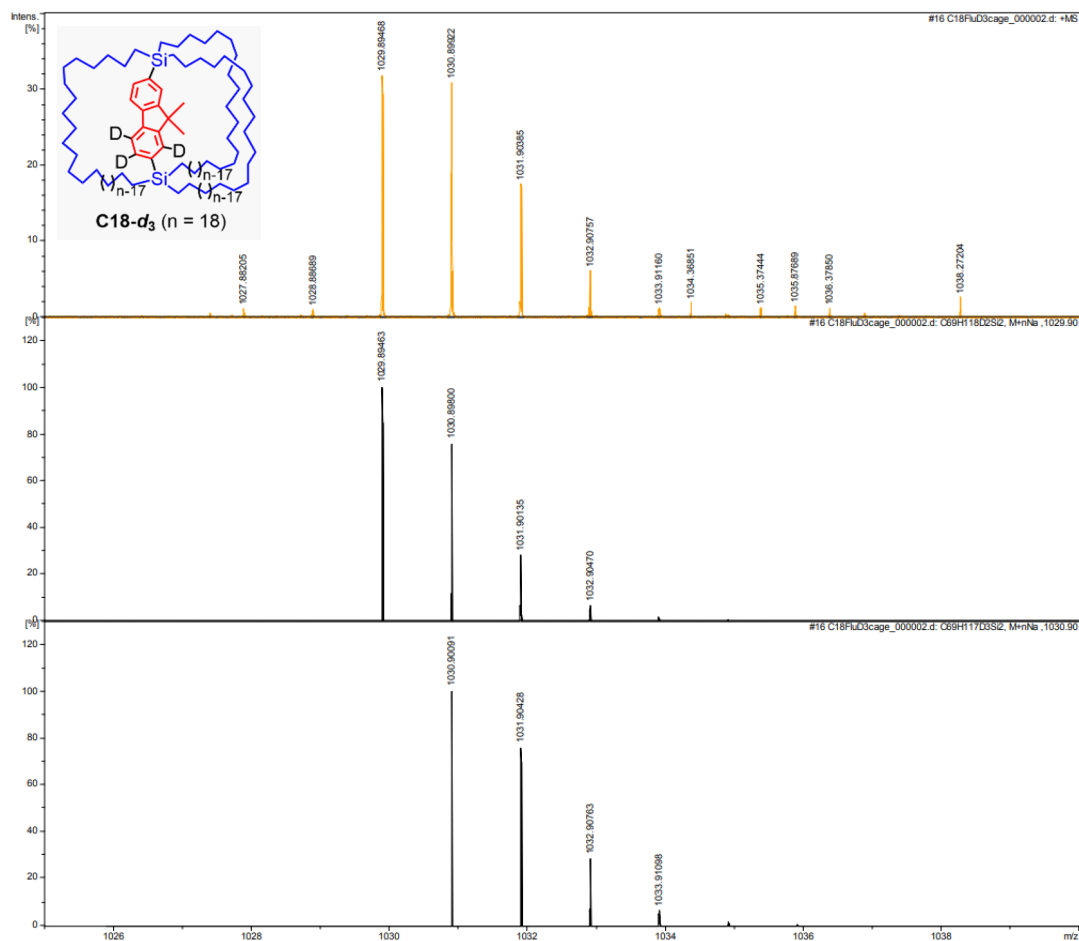

Fig. S30. HRMS spectrum of  $\text{C18-d}_3$  (ESI, positive). Top: obsd. Bottom: sim.



j. Spectra of C12FluC12-d<sub>3</sub>

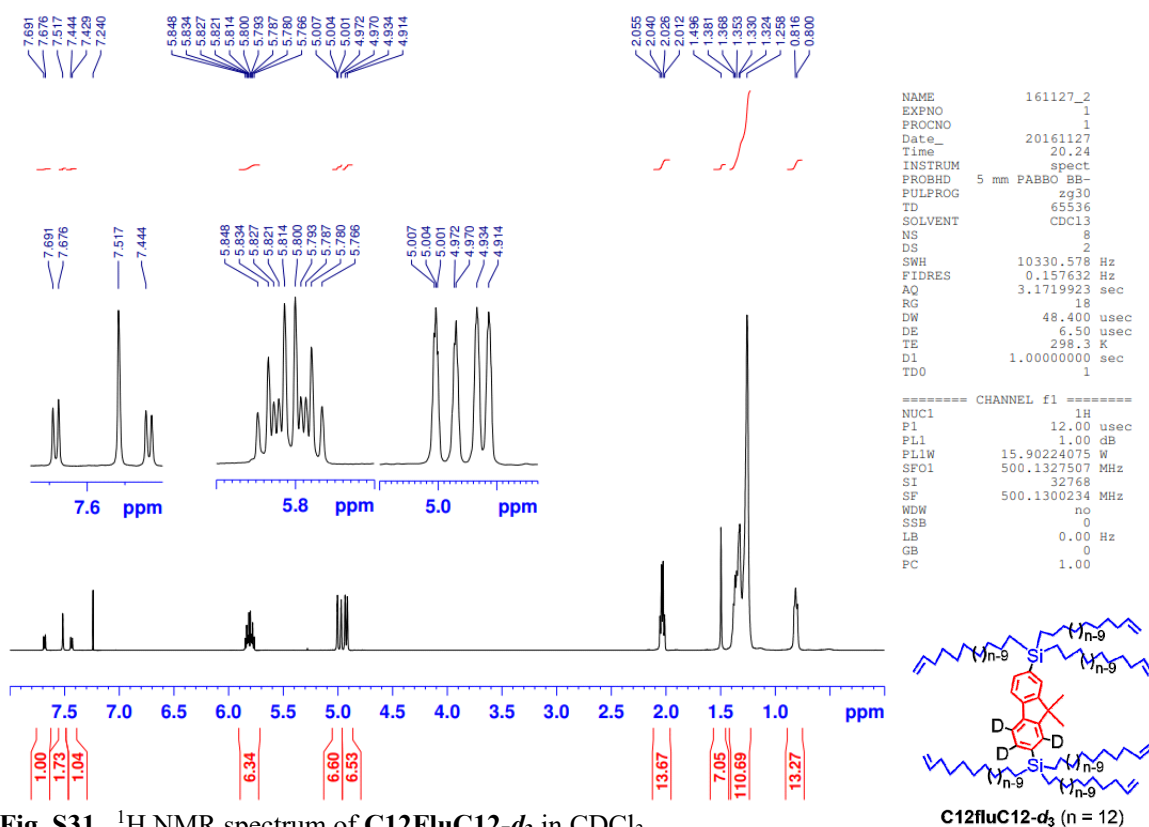

Fig. S31. <sup>1</sup>H NMR spectrum of C12FluC12-d<sub>3</sub> in CDCl<sub>3</sub>.

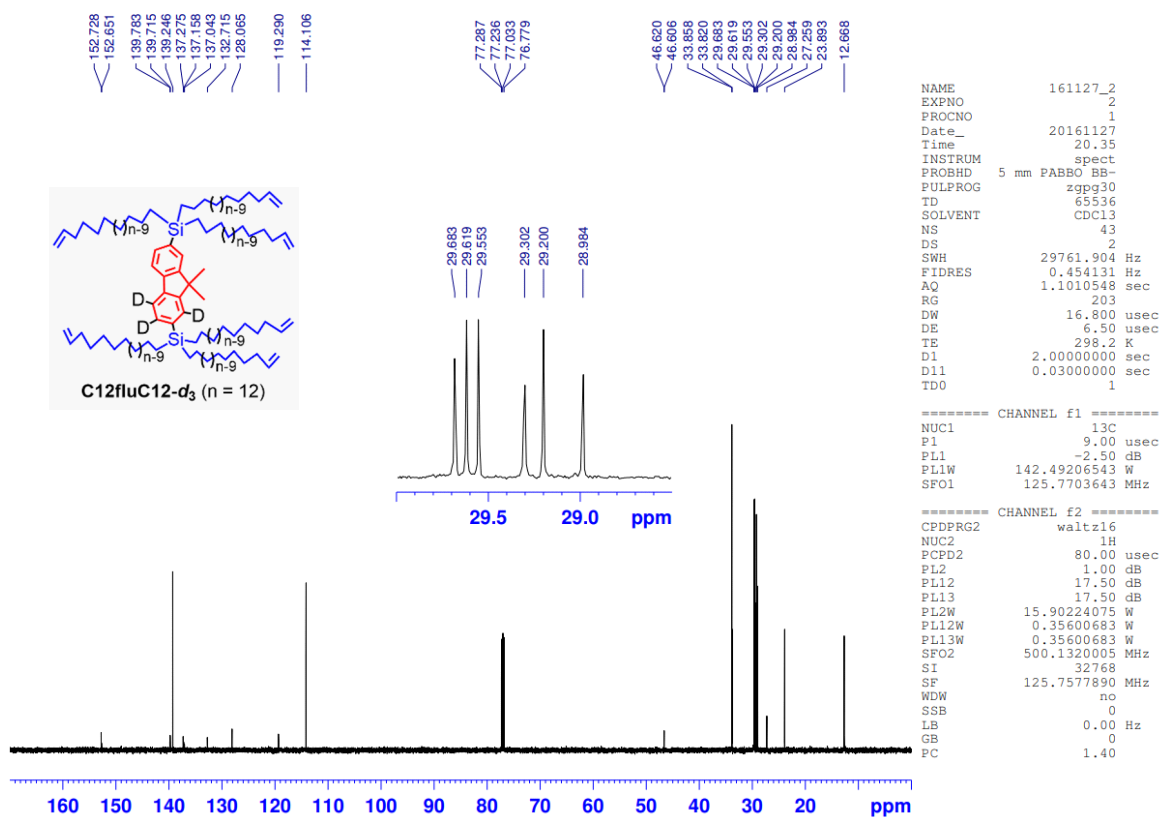

Fig. S32. <sup>13</sup>C NMR spectrum of C12FluC12-d<sub>3</sub> in CDCl<sub>3</sub>.

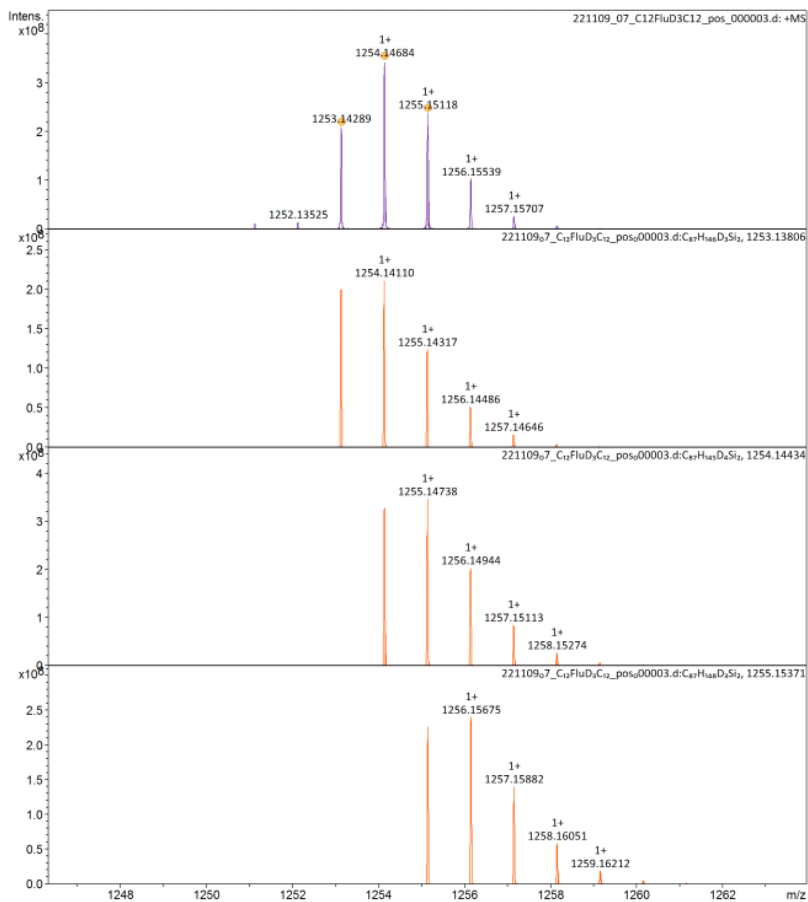

Fig. S33. HRMS spectrum of C12FluC12- $d_3$  (ESI, positive). Top: obsd. Bottom: sim.

### I. Spectra of C22- $d_3$

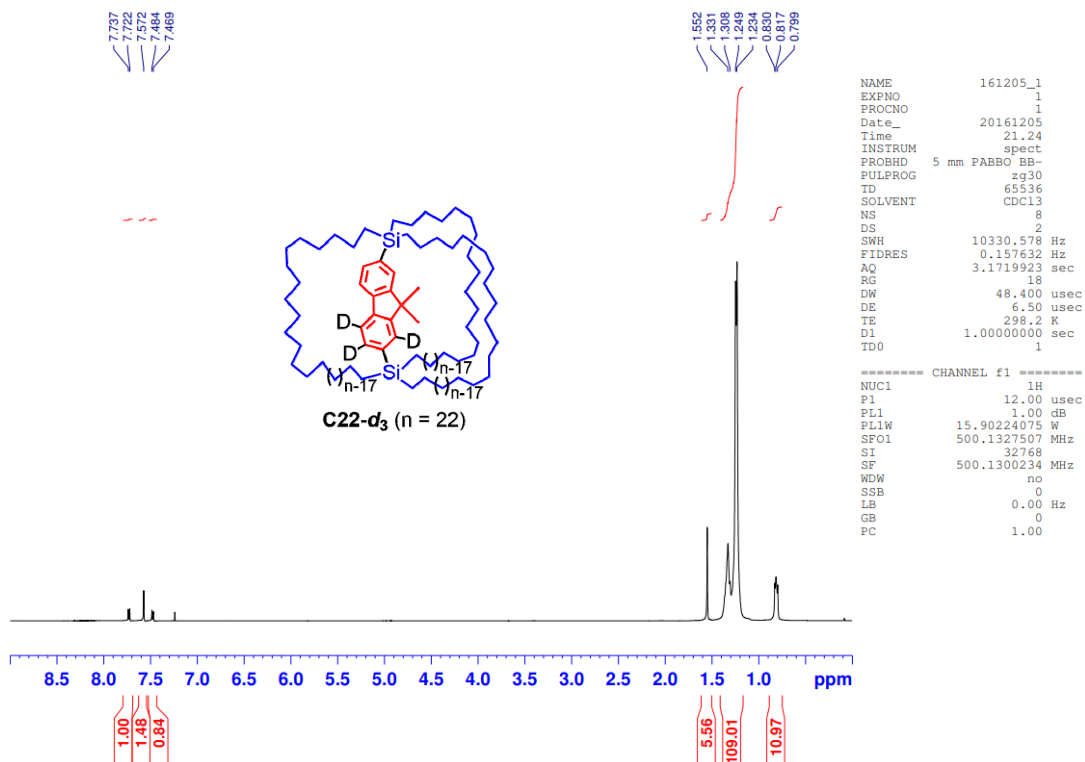

Fig. S34.  $^1\text{H}$  NMR spectrum of C22- $d_3$  in  $\text{CDCl}_3$ .

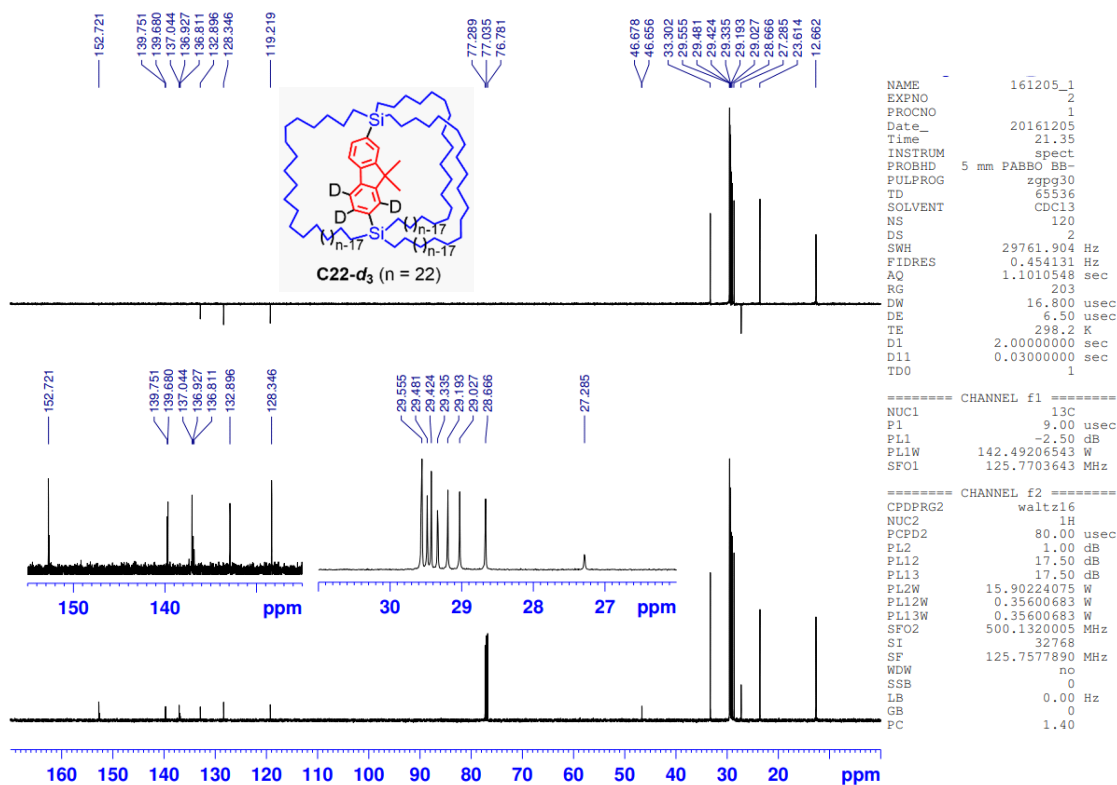

Fig. S35.  $^{13}\text{C}$  NMR spectrum of  $\text{C22-d}_3$  in  $\text{CDCl}_3$ .

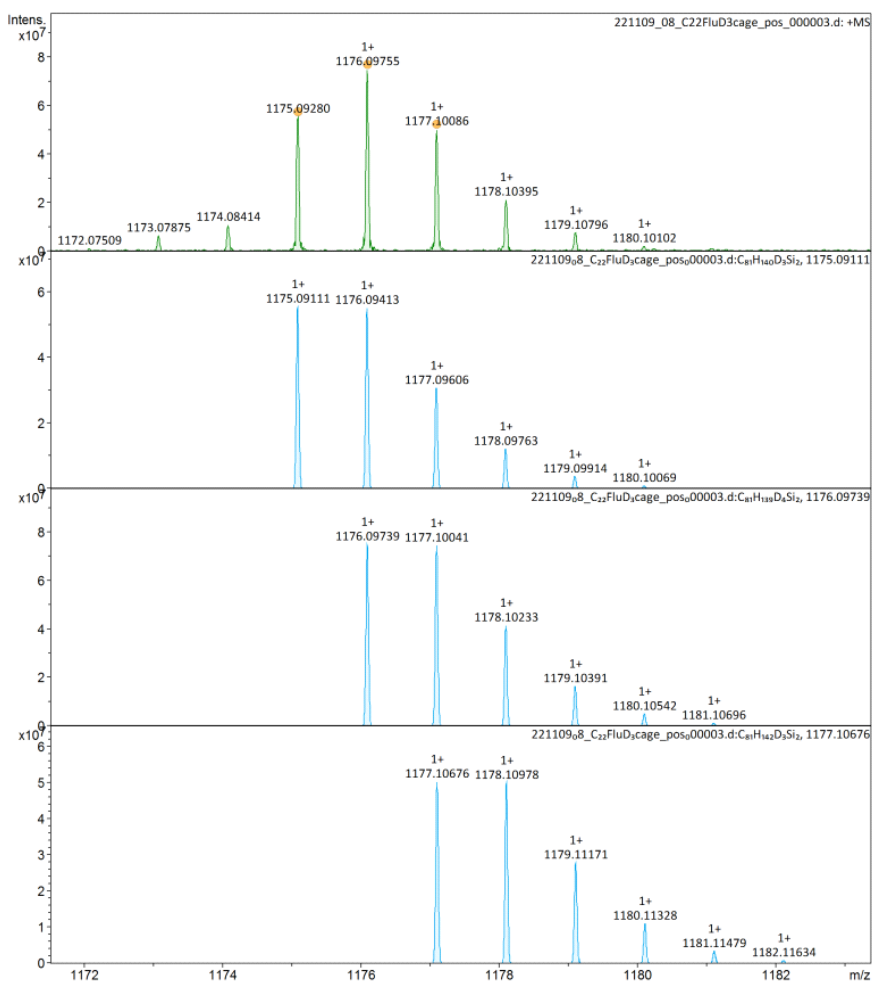

Fig. S36. HRMS spectrum of  $\text{C22-d}_3$  (ESI, positive). Top: obsd. Bottom: sim.

## 2. Appended Data of X-ray Crystallography

### 2-1. Crystal Data

**Table S1.** Crystal Data

| Compound                             | C18                                                           | C22•2EtOH                                                                             | Flu                                                           | TMS                                                         |                           |
|--------------------------------------|---------------------------------------------------------------|---------------------------------------------------------------------------------------|---------------------------------------------------------------|-------------------------------------------------------------|---------------------------|
| CCDC #                               | 2223164                                                       | 2223165                                                                               | 2239859                                                       | 2239860                                                     |                           |
| Empirical formula                    | C <sub>69</sub> H <sub>120</sub> Si <sub>2</sub>              | C <sub>81</sub> H <sub>144</sub> Si <sub>2</sub> , 2(C <sub>2</sub> H <sub>6</sub> O) | C <sub>15</sub> H <sub>14</sub>                               | C <sub>21</sub> H <sub>30</sub> Si <sub>2</sub>             |                           |
| Temperature                          | 200(2) K                                                      | 180(2) K                                                                              | 200(2) K                                                      | 200(2) K                                                    |                           |
| Crystal shape & Color                | Prism, colorless                                              | Prism, colorless                                                                      | Prism, colorless                                              | Prism, colorless                                            |                           |
| Crystal size                         | 0.150 x 0.140 x 0.100 mm <sup>3</sup>                         | 0.200 x 0.100 x 0.080 mm <sup>3</sup>                                                 | 0.400 x 0.200 x 0.100 mm <sup>3</sup>                         | 0.300 x 0.150 x 0.100 mm <sup>3</sup>                       |                           |
| Formula weight / g mol <sup>-1</sup> | 1005.82                                                       | 1266.27                                                                               | 194.26                                                        | 338.63                                                      |                           |
| Crystal system                       | Triclinic                                                     | Monoclinic                                                                            | Tetragonal                                                    | Monoclinic                                                  |                           |
| Space group                          | <i>P</i> -1                                                   | <i>C</i> 2/ <i>c</i>                                                                  | <i>I</i> 4 <sub>1</sub> / <i>a</i>                            | <i>P</i> 2 <sub>1</sub> / <i>c</i>                          |                           |
| Z                                    | 2                                                             | 8                                                                                     | 16                                                            | 4                                                           |                           |
| Calculated density                   | 0.995 Mg/m <sup>3</sup>                                       | 0.994 Mg/m <sup>3</sup>                                                               | 1.130 Mg/m <sup>3</sup>                                       | 1.068 Mg/m <sup>3</sup>                                     |                           |
| Cell parameter                       | <i>a</i>                                                      | 11.6403(14) Å                                                                         | 34.1454(8) Å                                                  | 21.6843(2) Å                                                | 14.1329(3) Å              |
|                                      | <i>b</i>                                                      | 18.4301(10) Å                                                                         | 24.9090(6) Å                                                  | 21.6843(2) Å                                                | 6.59460(10) Å             |
|                                      | <i>c</i>                                                      | 18.5637(16) Å                                                                         | 22.8091(5) Å                                                  | 9.7108(2) Å                                                 | 23.4684(5) Å              |
|                                      | $\alpha$                                                      | 60.565(11)°                                                                           | 90°                                                           | 90°                                                         | 90°                       |
|                                      | $\beta$                                                       | 80.343(15)°                                                                           | 119.3180(10)°                                                 | 90°                                                         | 105.6690(10)°             |
|                                      | $\gamma$                                                      | 75.890(15)°                                                                           | 90°                                                           | 90°                                                         | 90°                       |
|                                      | <i>V</i>                                                      | 3358.3(8) Å <sup>3</sup>                                                              | 16915.0(7) Å <sup>3</sup>                                     | 4566.10(13) Å <sup>3</sup>                                  | 2105.99(7) Å <sup>3</sup> |
| F(000)                               | 1124                                                          | 1140                                                                                  | 1664                                                          | 736                                                         |                           |
| Absorption coefficient               | 0.089 mm <sup>-1</sup>                                        | 0.676 mm <sup>-1</sup>                                                                | 0.476 mm <sup>-1</sup>                                        | 1.491 mm <sup>-1</sup>                                      |                           |
| $\theta$ range for collection        | 3.020 to 25.000° (MoK $\alpha$ )                              | 2.313 to 67.998° (CuK $\alpha$ )                                                      | 6.450 to 77.434° (CuK $\alpha$ )                              | 3.912 to 77.432° (CuK $\alpha$ )                            |                           |
| Index ranges                         | -13 ≤ <i>h</i> ≤ 13, -21 ≤ <i>k</i> ≤ 21, -22 ≤ <i>l</i> ≤ 22 | -40 ≤ <i>h</i> ≤ 41, -29 ≤ <i>k</i> ≤ 29, -27 ≤ <i>l</i> ≤ 27                         | -27 ≤ <i>h</i> ≤ 24, -26 ≤ <i>k</i> ≤ 26, -12 ≤ <i>l</i> ≤ 11 | -16 ≤ <i>h</i> ≤ 17, -7 ≤ <i>k</i> ≤ 6, -29 ≤ <i>l</i> ≤ 28 |                           |
| Reflections collected                | 51256                                                         | 70491                                                                                 | 18692                                                         | 17125                                                       |                           |
| Independent reflections              | 11729 [R(int) = 0.1803]                                       | 15353 [R(int) = 0.1011]                                                               | 2400 [R(int) = 0.0372]                                        | 4309 [R(int) = 0.0296]                                      |                           |
| Completeness                         | 99.3 %                                                        | 99.6 %                                                                                | 99.6 %                                                        | 98.7 %                                                      |                           |
| Goodness-of-fit on F <sup>2</sup>    | 1.060                                                         | 1.434                                                                                 | 1.078                                                         | 1.082                                                       |                           |
| Final R indices [I > 2σ(I)]          | R1 = 0.1248, wR2 = 0.3516                                     | R1 = 0.1390, wR2 = 0.3924                                                             | R1 = 0.0536, wR2 = 0.1285                                     | R1 = 0.0410, wR2 = 0.1049                                   |                           |
| R indices (all data)                 | R1 = 0.2064, wR2 = 0.3847                                     | R1 = 0.1921, wR2 = 0.4429                                                             | R1 = 0.0564, wR2 = 0.1311                                     | R1 = 0.0420, wR2 = 0.1059                                   |                           |

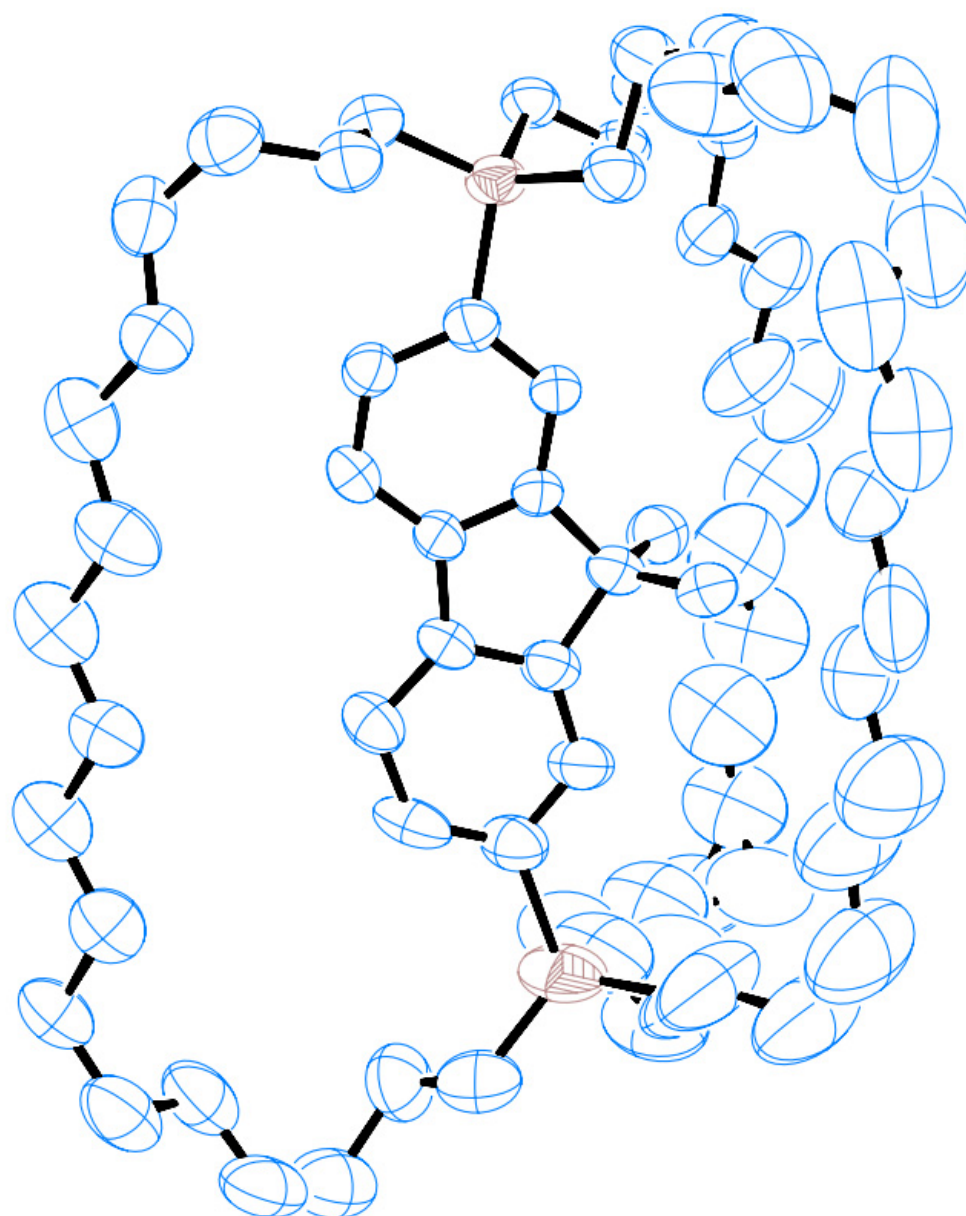

**Fig. S37.** An ORTEP drawing (30% thermal ellipsoids) of molecular structure of **C18** determined by X-ray crystallography.

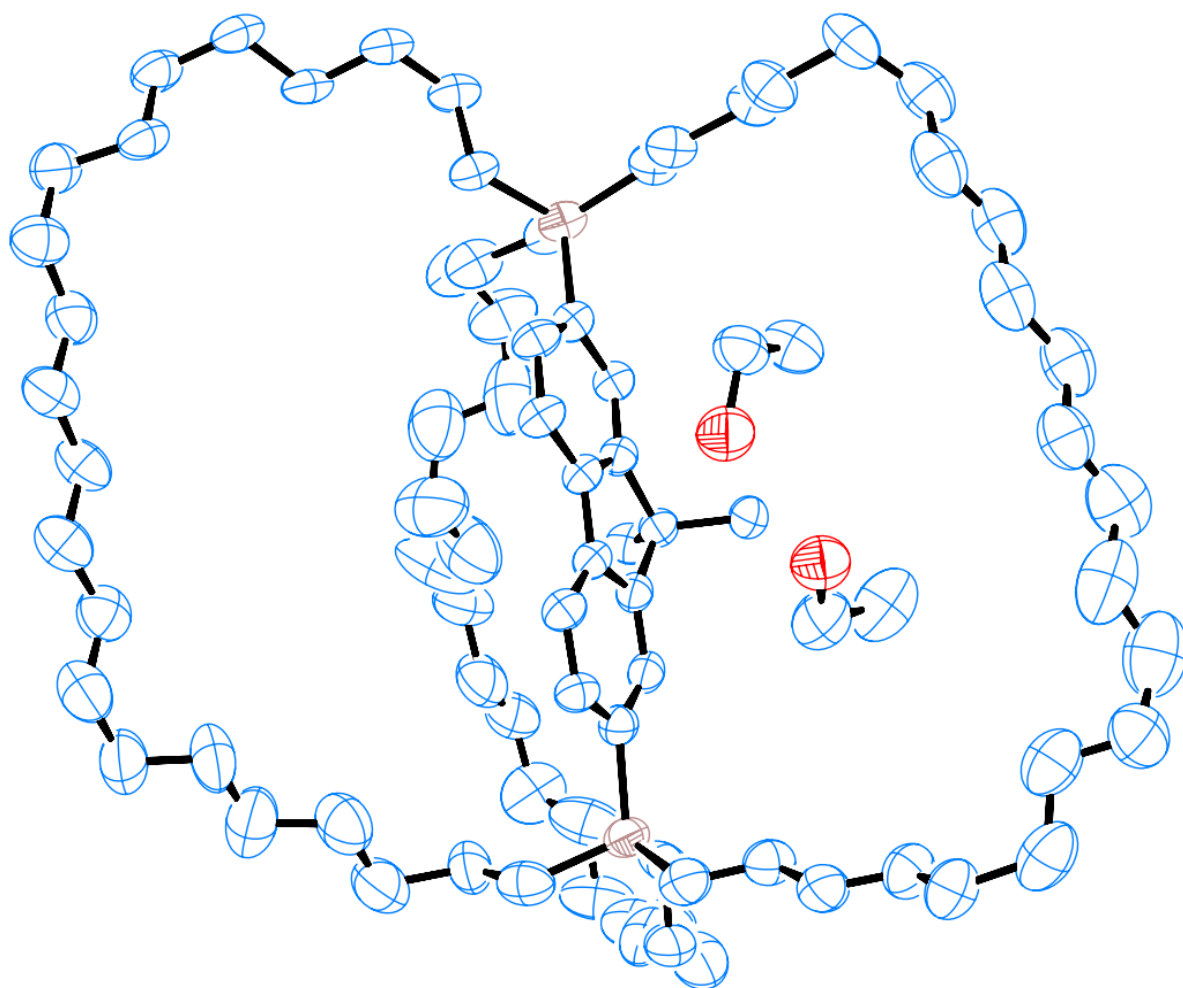

**Fig. S38.** An ORTEP drawing (30% thermal ellipsoids) of molecular structure of **C<sub>22</sub>•2EtOH** determined by X-ray crystallography.

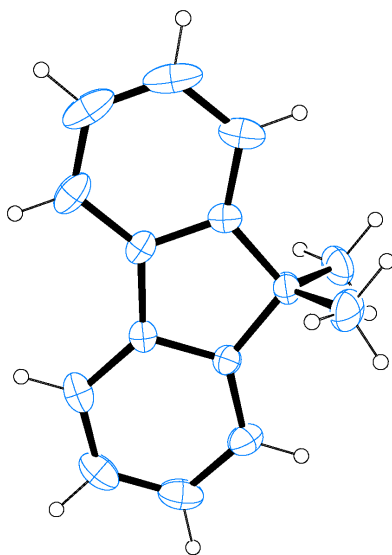

**Fig. S39.** An ORTEP drawing (30% thermal ellipsoids) of molecular structure of **Flu** determined by X-ray crystallography.

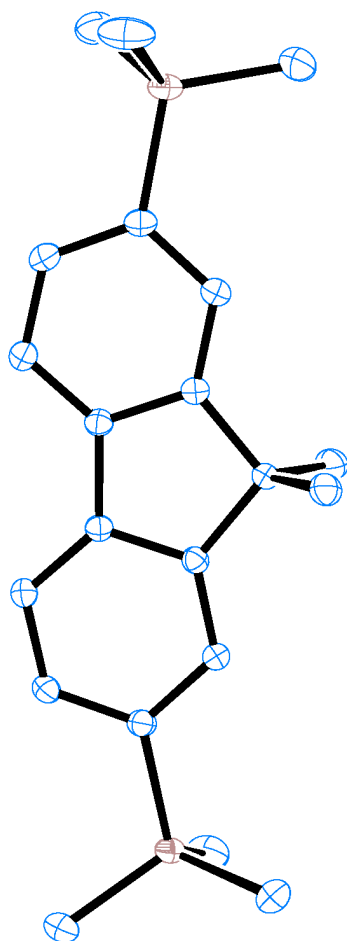

**Fig. S40.** An ORTEP drawing (30% thermal ellipsoids) of molecular structure of **TMS** determined by X-ray crystallography.



### 3. Appended Data of Fluorescence Measurements

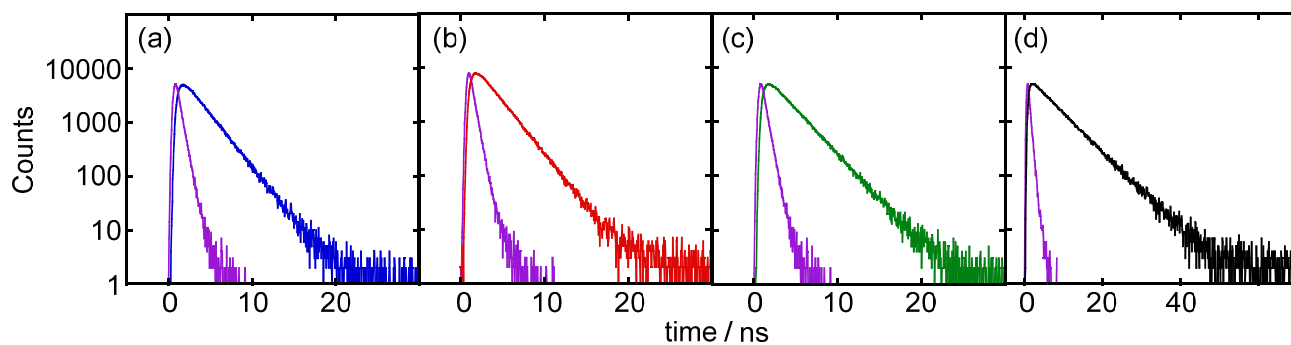

**Fig. S41.** Fluorescence life-time measurements for fluorenes in hexane (The excitation pulse was indicated with purple line.): (a) **C18**, (b) **C22**, (c) **TMS**, and (d) **Flu**.

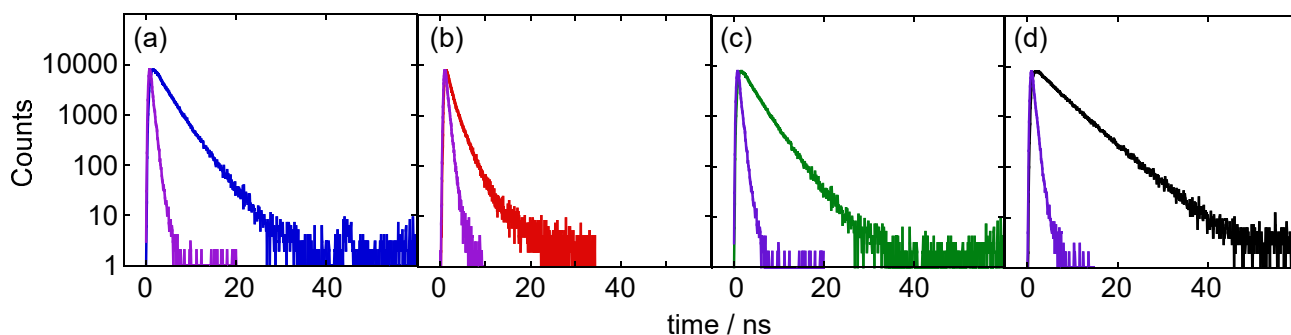

**Fig. S42.** Fluorescence life-time measurements for fluorenes in solid-states (The excitation pulse was indicated with purple line.): (a) **C18**, (b) **C22**, (c) **TMS**, and (d) **Flu**.

## 4. Appended Data of Solid-state $^2\text{H}$ NMR Study

### a. Analysis of $^2\text{H}$ NMR spin-lattice relaxation ( $T_1$ ) measurements

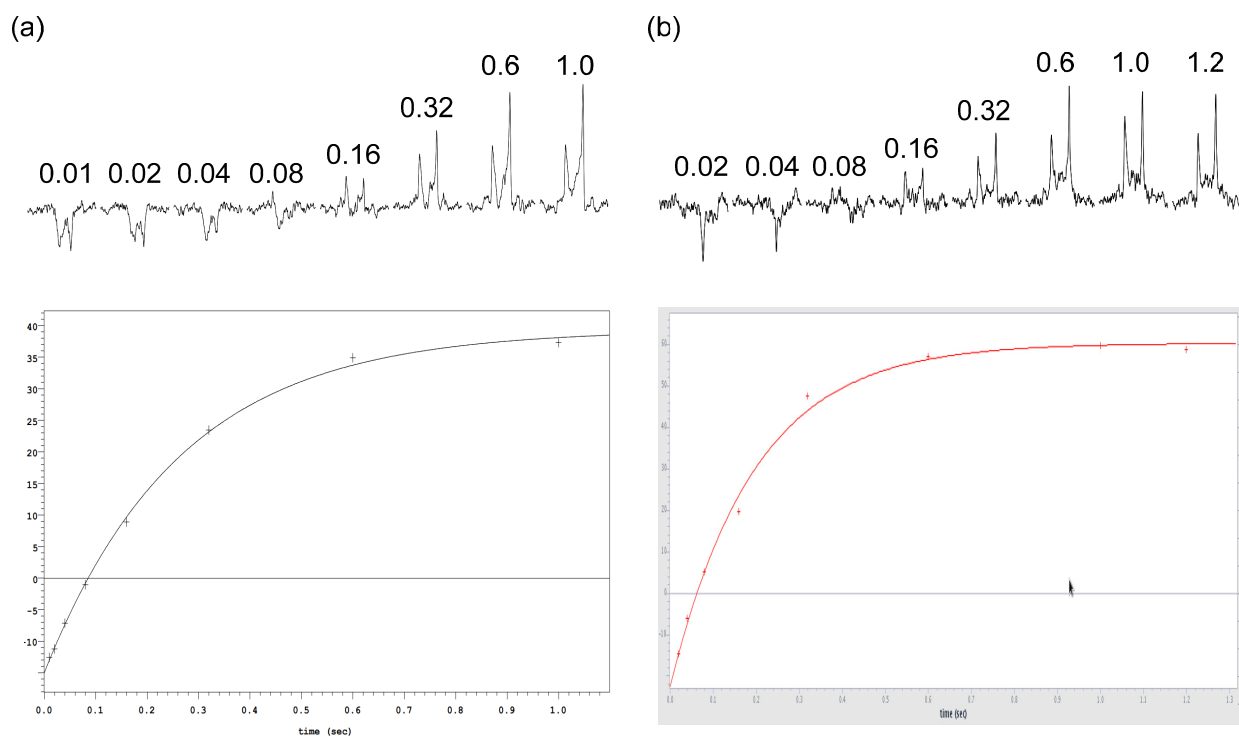

**Figure S43** Inversion-recovery  $^2\text{H}$  NMR spectroscopy data (300 K) and single exponential fit of (a)  $\text{C18-}d_3$  and (b)  $\text{C22-}d_3$ .
